# Supplementary material
Source: PubMed Central journal article supplement (PMC4171948)
Supplement: NIHMS617183-supplement-Supplementary-table_figure.pdf [file NIHMS617183-supplement-Supplementary-table_figure.pdf]

## Supplementary

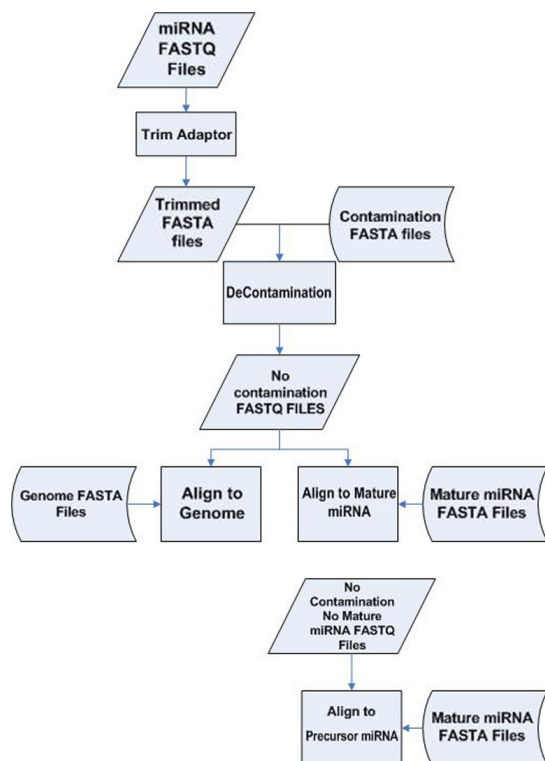

Figure S1 Workflow diagram of miRNA sequencing data processing.

| Table S1 Fold changes computed between non-normal and normal samples using data from different normalization methods |           |                                |                               |                             |                      |
|----------------------------------------------------------------------------------------------------------------------|-----------|--------------------------------|-------------------------------|-----------------------------|----------------------|
|                                                                                                                      | Quantile  | Median counts<br>normalization | Total counts<br>normalization | Trimmed mean of<br>M-values | Conditional quantile |
| hsa-let-7a                                                                                                           | 0.0042754 | -0.552633                      | -0.015109                     | -0.120488                   | -0.054226            |
| hsa-let-7a*                                                                                                          | -0.18413  | -0.548296                      | -0.006195                     | -0.203041                   | 0.0656697            |
| hsa-let-7a-2*                                                                                                        | -0.158218 | -0.217502                      | 0.1804967                     | -2.619008                   | 0.2711231            |
| hsa-let-7b                                                                                                           | 0.0975594 | -0.44166                       | 0.0344891                     | -0.010573                   | 0.0887056            |
| hsa-let-7b*                                                                                                          | -0.313777 | -0.6457                        | -0.073251                     | -0.3929                     | -0.066944            |
| hsa-let-7c                                                                                                           | -0.113039 | -0.592386                      | -0.042367                     | -0.161151                   | -0.222384            |
| hsa-let-7d                                                                                                           | -0.148097 | -0.578109                      | -0.035374                     | -0.146155                   | -0.236482            |
| hsa-let-7d*                                                                                                          | -0.344158 | -0.746767                      | -0.116632                     | -0.472896                   | -0.164616            |
| hsa-let-7e                                                                                                           | 0.0354432 | -0.419692                      | 0.0479995                     | 0.0123512                   | -0.074153            |
| hsa-let-7e*                                                                                                          | 0.2407919 | 0.1545067                      | 0.3774342                     | -0.557753                   | 0.6431319            |
| hsa-let-7f                                                                                                           | -0.151042 | -0.741798                      | -0.113138                     | -0.310237                   | -0.24062             |
| hsa-let-7f-1*                                                                                                        | -0.249712 | -0.47145                       | 0.1973019                     | -0.650713                   | -0.086965            |
| hsa-let-7f-2*                                                                                                        | -0.243696 | -0.434909                      | 0.0884345                     | -0.304026                   | -0.050423            |

Table S1 (continued)

Table S1 (continued)

|                 | Quantile  | Median counts<br>normalization | Total counts<br>normalization | Trimmed mean of<br>M-values | Conditional quantile |
|-----------------|-----------|--------------------------------|-------------------------------|-----------------------------|----------------------|
| hsa-let-7g      | -0.18629  | -0.72786                       | -0.106519                     | -0.297131                   | -0.301865            |
| hsa-let-7g*     | 0.3024209 | 0.1323177                      | 0.2670902                     | 0.438865                    | 0.3272325            |
| hsa-let-7i      | -0.150876 | -0.646183                      | -0.057955                     | -0.217182                   | -0.249411            |
| hsa-let-7i*     | -0.392518 | -0.61949                       | -0.019417                     | -0.670599                   | -0.300113            |
| hsa-miR-1       | 0.077636  | 0.0440267                      | 0.4009056                     | -1.434823                   | 0.7414699            |
| hsa-miR-100     | -0.021232 | -0.455459                      | 0.0292959                     | -0.02215                    | 0.0231356            |
| hsa-miR-100*    | 0.1771578 | 0.0638577                      | 0.0305435                     | -0.524743                   | 0.517455             |
| hsa-miR-101     | 0.0012021 | -0.576757                      | -0.033227                     | -0.145183                   | -0.120285            |
| hsa-miR-101*    | 0.2191501 | 0.0812448                      | 0.261619                      | -0.285612                   | 0.6038891            |
| hsa-miR-103a    | 0.1523641 | -0.270899                      | 0.1220487                     | 0.1592919                   | 0.2511515            |
| hsa-miR-103a-2* | 0.0923589 | -0.067084                      | 0.5337087                     | -1.21875                    | 0.4997937            |
| hsa-miR-103b    | 0.2114169 | -0.273994                      | 0.1209576                     | 0.1561336                   | 0.2724068            |
| hsa-miR-105     | 0.1065727 | 0.1111111                      | NA                            | 0.4957244                   | 0.6779892            |
| hsa-miR-105*    | -0.037195 | -0.138889                      | 0.8332013                     | -3.571142                   | 0.3837554            |
| hsa-miR-106a    | 0.6502755 | 0.2039072                      | 0.2776772                     | 0.7553998                   | 0.6588102            |
| hsa-miR-106b    | 0.1736293 | -0.218978                      | 0.1539305                     | 0.2038544                   | 0.2599344            |
| hsa-miR-106b*   | 0.0365909 | -0.38354                       | 0.0951092                     | -0.066936                   | -0.292968            |
| hsa-miR-107     | -0.073772 | -0.523761                      | -0.012123                     | -0.100873                   | 0.0174642            |
| hsa-miR-10a     | 0.4497615 | -0.045872                      | 0.2424499                     | 0.3861475                   | 0.5314111            |
| hsa-miR-10a*    | 0.11054   | -0.107067                      | 0.1761645                     | 0.1210727                   | 0.34653              |
| hsa-miR-10b     | 0.7624902 | 0.3875374                      | 0.5038901                     | 0.8209039                   | 0.821074             |
| hsa-miR-10b*    | 0.0849502 | 0.0995823                      | NA                            | 0.1895837                   | 0.4840674            |
| hsa-miR-1178    | 0.0319384 | 0.0277778                      | NA                            | -0.325031                   | 0.5926139            |
| hsa-miR-1179    | -0.039864 | -0.111111                      | 0.1789538                     | -2.561475                   | 0.2924774            |
| hsa-miR-1180    | 0.0442287 | -0.06808                       | 0.2275139                     | -0.700321                   | 0.0448242            |
| hsa-miR-1181    | -0.150489 | -0.24528                       | 0.2357321                     | -2.937583                   | -0.132376            |
| hsa-miR-1182    | 0.0315998 | 0.0277778                      | NA                            | -0.305393                   | 0.2711022            |
| hsa-miR-1183    | 0.0353009 | 0.0555556                      | NA                            | -0.081342                   | 0.5131898            |
| hsa-miR-1184    | 0.0411136 | 0.0277778                      | NA                            | -0.359298                   | 0.2711022            |
| hsa-miR-1185    | -0.079325 | -0.092774                      | 0.0625024                     | -2.032532                   | 0.3108149            |
| hsa-miR-1193    | 0.0271807 | 0                              | 0.5057688                     | -1.959422                   | 0.1129043            |
| hsa-miR-1197    | 0.0572065 | 0.0277778                      | 0.506534                      | -1.578876                   | 0.4608924            |
| hsa-miR-1200    | -0.021412 | -0.055556                      | 0.1555878                     | -2.665839                   | 0.267004             |
| hsa-miR-1202    | -0.028935 | -0.055556                      | -0.235113                     | -2.858058                   | 0.0573487            |
| hsa-miR-1203    | 0.0867985 | 0.0833333                      | NA                            | 0.2397977                   | 0.1962376            |
| hsa-miR-1205    | 0.0645537 | 0.0555556                      | NA                            | 0.0889307                   | 0.6255592            |
| hsa-miR-1206    | -0.043403 | -0.083333                      | NA                            | -3.506723                   | 0.4789283            |
| hsa-miR-1207-3p | -0.043403 | -0.083333                      | NA                            | -3.520975                   | 0.3743009            |
| hsa-miR-1208    | -0.067578 | -0.083333                      | NA                            | -3.594299                   | 0.3918373            |
| hsa-miR-122     | 0.0536956 | -0.433403                      | 0.0428623                     | -0.001277                   | 0.0958689            |

Table S1 (continued)

**Table S1** (continued)

|                  | Quantile  | Median counts<br>normalization | Total counts<br>normalization | Trimmed mean of<br>M-values | Conditional quantile |
|------------------|-----------|--------------------------------|-------------------------------|-----------------------------|----------------------|
| hsa-miR-122*     | -0.394601 | -0.867036                      | -0.177712                     | -0.443009                   | -0.24683             |
| hsa-miR-1224-3p  | 0.0407311 | 0.0277778                      | NA                            | -0.359792                   | 0.140682             |
| hsa-miR-1225-3p  | -0.026972 | -0.055556                      | 0.7632455                     | -2.895249                   | 0.0573487            |
| hsa-miR-1225-5p  | -0.082163 | -0.060276                      | -0.182395                     | -3.437933                   | 0.0526286            |
| hsa-miR-1226     | -0.123339 | 0.016249                       | -0.805551                     | -5.5582                     | 0.3388086            |
| hsa-miR-1227     | -0.013539 | -0.055556                      | 0.4595415                     | -2.749834                   | 0.0573487            |
| hsa-miR-1228     | 0.0518658 | 0.0555556                      | 0.0465798                     | -1.258094                   | 0.1684598            |
| hsa-miR-1228*    | 0.0423059 | 0.0718045                      | NA                            | -0.129933                   | 0.1847088            |
| hsa-miR-1229     | -0.011045 | 0                              | -0.328942                     | -2.025249                   | 0.1129043            |
| hsa-miR-1231     | -0.021412 | -0.055556                      | 0.1555878                     | -2.665839                   | 0.0573487            |
| hsa-miR-1234     | 0.0339033 | 0.0555556                      | NA                            | -0.096797                   | 0.1684598            |
| hsa-miR-1237     | 0.0572917 | 0.1111111                      | NA                            | 0.2879637                   | 0.2240154            |
| hsa-miR-124      | 0.0325171 | 0.0277778                      | NA                            | -0.291863                   | 0.3105138            |
| hsa-miR-124*     | 0.0469846 | 0.0555556                      | NA                            | -0.032378                   | 0.5441807            |
| hsa-miR-1245     | 0.0460674 | 0.0555556                      | NA                            | -0.022767                   | 0.4591441            |
| hsa-miR-1245b-3p | 0.0298524 | 0.0555556                      | NA                            | -0.100872                   | 0.5091529            |
| hsa-miR-1246     | -0.021439 | -0.027778                      | 0.1154323                     | -2.338352                   | 0.3818727            |
| hsa-miR-1247     | -0.004115 | -0.032498                      | 0.0153119                     | -1.649718                   | 0.0804063            |
| hsa-miR-1248     | 0.1357098 | -0.055556                      | 0.713978                      | -1.249772                   | 0.376367             |
| hsa-miR-1249     | -0.038452 | -0.057644                      | 0.0182348                     | -1.953399                   | 0.0552602            |
| hsa-miR-1250     | 0.0219907 | 0.0555556                      | NA                            | -0.123455                   | 0.457093             |
| hsa-miR-1251     | 0.0530227 | -0.011529                      | 1.1140709                     | -2.049622                   | 0.3900086            |
| hsa-miR-1252     | -0.068593 | -0.083333                      | NA                            | -3.61354                    | 0.6141098            |
| hsa-miR-1253     | 0.0167824 | 0.0277778                      | NA                            | -0.363828                   | 0.5926139            |
| hsa-miR-1254     | -0.15908  | -0.159858                      | -0.471026                     | -4.689108                   | 0.0071752            |
| hsa-miR-1255a    | 0.081478  | 0.0833333                      | NA                            | 0.2855214                   | 0.5936678            |
| hsa-miR-1255b    | 0.0737147 | 0.0833333                      | NA                            | 0.3298641                   | 0.6059776            |
| hsa-miR-1256     | -0.082232 | -0.027778                      | -0.831855                     | -3.929611                   | 0.4948665            |
| hsa-miR-1258     | 0.1087585 | 0.0718045                      | 0.5928062                     | -1.223144                   | 0.5049192            |
| hsa-miR-125a-3p  | -0.03152  | -0.205973                      | 0.7729463                     | -2.711333                   | 0.1165863            |
| hsa-miR-125a-5p  | 0.1341571 | -0.365352                      | 0.0804656                     | 0.0683712                   | 0.1083033            |
| hsa-miR-125b     | -0.147199 | -0.568498                      | -0.024563                     | -0.135374                   | -0.079755            |
| hsa-miR-125b-1*  | -0.098735 | -0.420303                      | 0.2448835                     | 0.0251653                   | -0.097743            |
| hsa-miR-125b-2*  | -0.331861 | -0.742378                      | -0.132285                     | -0.336002                   | -0.218625            |
| hsa-miR-126      | -0.389975 | -0.821643                      | -0.148951                     | -0.391392                   | -0.324391            |
| hsa-miR-126*     | -0.063021 | -0.513257                      | -0.002458                     | -0.081553                   | -0.205824            |
| hsa-miR-1260     | -0.499207 | -0.790783                      | -0.108406                     | -0.509543                   | -0.633407            |
| hsa-miR-1260b    | 0.041004  | -0.353678                      | 0.0642163                     | -0.03776                    | 0.028874             |
| hsa-miR-1261     | -0.44029  | -0.518881                      | -0.188358                     | -2.682598                   | -0.10923             |
| hsa-miR-1262     | 0.0608735 | 0.0833333                      | NA                            | 0.2207111                   | 0.5369306            |

**Table S1** (continued)

Table S1 (continued)

|                | Quantile  | Median counts<br>normalization | Total counts<br>normalization | Trimmed mean of<br>M-values | Conditional quantile |
|----------------|-----------|--------------------------------|-------------------------------|-----------------------------|----------------------|
| hsa-miR-1263   | 0.0268719 | 0.0440267                      | NA                            | -0.379674                   | 0.6140303            |
| hsa-miR-1264   | -0.001386 | -0.055556                      | 1.0412926                     | -2.600249                   | 0.3297738            |
| hsa-miR-1265   | 0.0304755 | 0                              | 0.2485745                     | -1.871528                   | 0.5226443            |
| hsa-miR-1266   | -0.057019 | -0.055556                      | -0.514906                     | -2.946334                   | 0.1877689            |
| hsa-miR-1267   | -0.10777  | -0.187636                      | 0.5615708                     | -3.79268                    | 0.3772003            |
| hsa-miR-1268   | -0.032495 | 0                              | -0.496636                     | -2.129263                   | 0.1129043            |
| hsa-miR-1268b  | 0.3758835 | 0.3578936                      | 0.4944554                     | 0.0879026                   | 0.4707979            |
| hsa-miR-1269   | 0.1415395 | 0.1226399                      | 0.1070261                     | -0.805409                   | 0.2355442            |
| hsa-miR-1269b  | -0.517975 | -0.738666                      | -0.000321                     | -4.283057                   | -0.416107            |
| hsa-miR-127-3p | 0.0725727 | -0.354673                      | 0.073697                      | 0.0758375                   | 0.071418             |
| hsa-miR-127-5p | -0.424905 | -0.646881                      | 0.0148511                     | -1.227958                   | -0.157354            |
| hsa-miR-1270   | 0.0619483 | 0.0440267                      | 0.3706062                     | -1.611415                   | 0.6109048            |
| hsa-miR-1271   | 0.1085911 | 0.1551378                      | NA                            | 0.5059705                   | 0.643763             |
| hsa-miR-1272   | 0.0593776 | 0.0833333                      | NA                            | 0.2210016                   | 0.4792351            |
| hsa-miR-1273   | -0.115785 | -0.222222                      | 0.0058524                     | -2.9933                     | 0.3461215            |
| hsa-miR-1273c  | 0.0104167 | 0.0277778                      | NA                            | -0.385619                   | 0.3503374            |
| hsa-miR-1273d  | -0.087832 | -0.111111                      | -0.37867                      | -3.380514                   | 0.331675             |
| hsa-miR-1273e  | -0.022116 | -0.027778                      | 0.1966821                     | -2.376378                   | 0.5422258            |
| hsa-miR-1273f  | 0.0194357 | 0.0277778                      | NA                            | -0.364046                   | 0.4000048            |
| hsa-miR-1273g  | -0.116095 | -0.083333                      | NA                            | -5.331477                   | 0.4052918            |
| hsa-miR-1275   | 0.0941764 | -0.047299                      | 0.3178966                     | -0.171344                   | 0.0656057            |
| hsa-miR-1276   | 0.0582202 | 0.0833333                      | NA                            | 0.2217114                   | 0.6533369            |
| hsa-miR-1277   | -0.078718 | -0.13208                       | 0.1082242                     | -3.047432                   | 0.5653629            |
| hsa-miR-1278   | 0.0431739 | 0.0555556                      | NA                            | -0.051171                   | 0.6634847            |
| hsa-miR-1279   | -0.116095 | -0.083333                      | NA                            | -5.331477                   | 0.5776075            |
| hsa-miR-128    | -0.580343 | -0.897095                      | -0.229944                     | -0.514061                   | -0.326887            |
| hsa-miR-1280   | -0.305756 | -0.523601                      | 0.0074338                     | -1.183799                   | -0.405195            |
| hsa-miR-1281   | -0.107367 | -0.166667                      | -0.148364                     | -3.345824                   | -0.053762            |
| hsa-miR-1282   | -0.217975 | -0.277778                      | -0.109024                     | -4.76404                    | 0.1016423            |
| hsa-miR-1283   | 0.0068058 | -0.039307                      | 1.0941124                     | -2.564258                   | 0.3451785            |
| hsa-miR-1284   | 0.0665765 | 0.0833333                      | NA                            | 0.1536117                   | 0.6059776            |
| hsa-miR-1285   | -0.082957 | -0.167796                      | -0.028706                     | -1.085793                   | 0.402208             |
| hsa-miR-1286   | -0.029442 | -0.138889                      | 0.4642066                     | -2.822676                   | 0.2626486            |
| hsa-miR-1287   | -0.173507 | -0.28513                       | 0.0565032                     | -1.691689                   | 0.2034956            |
| hsa-miR-1288   | -0.092079 | -0.027778                      | -1.138093                     | -3.963674                   | 0.3737597            |
| hsa-miR-1289   | 0.0015072 | -0.027778                      | 0.3062307                     | -2.302106                   | 0.4271252            |
| hsa-miR-129*   | -0.021401 | -0.094862                      | 0.7032703                     | -2.817068                   | 0.289623             |
| hsa-miR-129-3p | 0.0452977 | 0.0555556                      | NA                            | 0.003228                    | 0.5781998            |
| hsa-miR-129-5p | 0.0144676 | 0.0277778                      | -0.024491                     | -1.700264                   | 0.4293152            |
| hsa-miR-1290   | -0.059771 | -0.055556                      | -0.471556                     | -2.96136                    | 0.3540949            |

Table S1 (continued)

Table S1 (continued)

|                | Quantile  | Median counts<br>normalization | Total counts<br>normalization | Trimmed mean of<br>M-values | Conditional quantile |
|----------------|-----------|--------------------------------|-------------------------------|-----------------------------|----------------------|
| hsa-miR-1291   | -0.037182 | -0.011529                      | -0.003568                     | -3.337353                   | 0.3428904            |
| hsa-miR-1292   | -0.110019 | -0.083333                      | -0.505105                     | -4.033334                   | 0.0295709            |
| hsa-miR-1294   | -0.054053 | -0.027778                      | -0.297223                     | -3.759619                   | 0.4948665            |
| hsa-miR-1295   | 0.0083225 | -0.067084                      | 0.6684768                     | -2.595958                   | 0.3344531            |
| hsa-miR-1296   | -0.643212 | -0.856654                      | -0.163871                     | -0.90896                    | -0.797853            |
| hsa-miR-1297   | 0.0733904 | 0.0555556                      | NA                            | 0.0373284                   | 0.5470634            |
| hsa-miR-1298   | -0.113241 | -0.083333                      | NA                            | -5.324624                   | 0.4393109            |
| hsa-miR-1299   | 0.0865154 | 0.1640351                      | -0.384283                     | -2.473805                   | 0.6866793            |
| hsa-miR-1301   | 0.197596  | 0.0221072                      | 0.416199                      | 0.0906744                   | 0.3827196            |
| hsa-miR-1302   | 0.0469846 | 0.0555556                      | NA                            | -0.032378                   | 0.6178172            |
| hsa-miR-1303   | 0.0593141 | -0.032996                      | 0.2130132                     | -0.672862                   | 0.5370079            |
| hsa-miR-1304   | 0.0698455 | 0                              | 0.8325362                     | -1.831171                   | 0.5226443            |
| hsa-miR-1306   | 0.0935354 | 0.1111111                      | NA                            | 0.3605023                   | 0.3433012            |
| hsa-miR-1307   | -0.188815 | -0.586365                      | -0.048574                     | -0.317728                   | -0.53255             |
| hsa-miR-130a   | 0.1037295 | -0.354652                      | 0.0695294                     | 0.0741325                   | 0.0365976            |
| hsa-miR-130a*  | 0.0283565 | 0.0555556                      | NA                            | -0.10299                    | 0.5781998            |
| hsa-miR-130b   | -0.235221 | -0.621344                      | -0.066183                     | -0.232446                   | -0.102791            |
| hsa-miR-130b*  | 0.0978046 | -0.201672                      | -0.136478                     | -0.349342                   | 0.363164             |
| hsa-miR-132    | -0.581103 | -0.93862                       | -0.255027                     | -0.650995                   | -0.368617            |
| hsa-miR-132*   | 0.0877946 | 0.1111111                      | NA                            | 0.5026381                   | 0.6337554            |
| hsa-miR-1322   | 0.0104167 | 0.0277778                      | NA                            | -0.385619                   | 0.5632945            |
| hsa-miR-1323   | 0.0411136 | 0.0277778                      | NA                            | -0.358876                   | 0.4122629            |
| hsa-miR-133a   | 0.5196034 | 0.406969                       | 0.696053                      | 0.4373704                   | 0.9086981            |
| hsa-miR-133b   | 0.0502751 | -0.011529                      | 1.1076915                     | -2.127454                   | 0.5584748            |
| hsa-miR-134    | -0.136119 | -0.467993                      | 0.0598197                     | -0.265914                   | -0.142646            |
| hsa-miR-1343   | -0.010067 | -0.055556                      | 0.5541404                     | -2.716314                   | 0.0573487            |
| hsa-miR-135a   | 0.2482456 | 0.1991646                      | 0.5596842                     | -0.13071                    | 0.8398459            |
| hsa-miR-135a*  | 0.0388185 | 0.0277778                      | NA                            | -0.358367                   | 0.3503374            |
| hsa-miR-135b   | 0.2001196 | 0.1683026                      | 0.1262433                     | -0.672738                   | 0.6786371            |
| hsa-miR-136    | -0.07256  | -0.411139                      | -0.02079                      | -0.410118                   | 0.0991955            |
| hsa-miR-136*   | -0.221405 | -0.624554                      | -0.061554                     | -0.212158                   | -0.335801            |
| hsa-miR-137    | 0.0283565 | 0.0555556                      | NA                            | -0.10299                    | 0.56589              |
| hsa-miR-138    | -0.103574 | -0.225992                      | 0.059602                      | -1.123013                   | 0.2018922            |
| hsa-miR-138-1* | -0.032986 | -0.055556                      | -0.087781                     | -2.834679                   | 0.267004             |
| hsa-miR-138-2* | -0.283486 | -0.728854                      | -0.106086                     | -0.29732                    | -0.1807              |
| hsa-miR-139-3p | -0.053241 | -0.138889                      | 0.2075394                     | -3.508728                   | -0.025985            |
| hsa-miR-139-5p | -0.041997 | -0.459824                      | 0.0075614                     | -0.027                      | 0.0766038            |
| hsa-miR-140-3p | 0.1524763 | -0.321935                      | 0.0934241                     | 0.1063453                   | 0.0070416            |
| hsa-miR-140-5p | -0.032813 | -0.474375                      | -0.006237                     | -0.127337                   | 0.0482697            |
| hsa-miR-141    | 0.2423134 | 0.0138451                      | 0.4123535                     | 1.011042                    | 0.4202009            |

Table S1 (continued)

Table S1 (continued)

|                 | Quantile  | Median counts<br>normalization | Total counts<br>normalization | Trimmed mean of<br>M-values | Conditional quantile |
|-----------------|-----------|--------------------------------|-------------------------------|-----------------------------|----------------------|
| hsa-miR-141*    | 0.0185677 | 0.0277778                      | -0.056086                     | -1.73702                    | 0.550422             |
| hsa-miR-142-3p  | -0.009932 | -0.441353                      | 0.0558146                     | -0.034097                   | 0.0475289            |
| hsa-miR-142-5p  | 0.0012228 | -0.460971                      | 0.0337333                     | -0.031413                   | 0.0570327            |
| hsa-miR-143     | 0.3791933 | -0.103863                      | 0.2162381                     | 0.3280598                   | 0.3594632            |
| hsa-miR-143*    | 0.2889778 | 0.1858213                      | 0.1883919                     | -0.315494                   | 0.5047851            |
| hsa-miR-144     | 0.3140308 | -0.095092                      | 0.2932876                     | 0.3360041                   | 0.4995945            |
| hsa-miR-144*    | 0.3868912 | 0.0397073                      | 0.3598446                     | 0.5026446                   | 0.7035643            |
| hsa-miR-145     | 0.5379415 | 0.0915905                      | 0.3152353                     | 0.5266744                   | 0.5529406            |
| hsa-miR-145*    | -0.196041 | -0.566773                      | -0.026459                     | -0.224041                   | -0.171772            |
| hsa-miR-1468    | -0.558874 | -0.83574                       | -0.315986                     | -1.563524                   | -0.469655            |
| hsa-miR-1469    | -0.516595 | -0.536268                      | -0.144093                     | -3.272286                   | -0.423363            |
| hsa-miR-146a    | -0.053824 | -0.574206                      | -0.031036                     | -0.147435                   | -0.088099            |
| hsa-miR-146a*   | 0.0310098 | 0.0555556                      | NA                            | -0.102173                   | 0.4400407            |
| hsa-miR-146b-3p | -0.081435 | -0.446813                      | 0.0625247                     | -0.168697                   | -0.122079            |
| hsa-miR-146b-5p | 0.1286258 | -0.237483                      | 0.1639223                     | 0.1954114                   | 0.1605033            |
| hsa-miR-147     | 0.0115741 | 0.0277778                      | NA                            | -0.386914                   | 0.5977814            |
| hsa-miR-147b    | -0.039511 | -0.104302                      | 0.1161631                     | -2.656784                   | 0.4657012            |
| hsa-miR-148a    | -0.171728 | -0.779067                      | -0.127887                     | -0.347159                   | -0.145141            |
| hsa-miR-148a*   | -0.298511 | -0.737431                      | -0.119633                     | -0.311069                   | -0.259784            |
| hsa-miR-148b    | -0.231073 | -0.714967                      | -0.099405                     | -0.285777                   | -0.243608            |
| hsa-miR-148b*   | -0.114353 | -0.182916                      | 0.0829736                     | -1.499503                   | 0.2015695            |
| hsa-miR-149     | -0.050383 | -0.280144                      | 0.1385462                     | -0.228452                   | -0.032744            |
| hsa-miR-149*    | -0.029459 | -0.055556                      | 0.0293117                     | -2.490174                   | 0.0573487            |
| hsa-miR-150     | -0.160704 | -0.549183                      | 0.0110061                     | -0.130579                   | -0.0284              |
| hsa-miR-150*    | -0.104297 | -0.25                          | 0.1566727                     | -3.420207                   | -0.137096            |
| hsa-miR-151-3p  | -0.211251 | -0.624864                      | -0.056009                     | -0.195917                   | -0.048827            |
| hsa-miR-151-5p  | -0.29336  | -0.783057                      | -0.133804                     | -0.35573                    | -0.298846            |
| hsa-miR-151b    | 0.052236  | -0.020019                      | -0.023721                     | -1.163279                   | 0.4376156            |
| hsa-miR-152     | 0.0195483 | -0.407209                      | 0.0527372                     | 0.0129745                   | 0.1604119            |
| hsa-miR-153     | 0.1260272 | -0.051333                      | 0.2171154                     | -0.693867                   | 0.4022641            |
| hsa-miR-1537    | 0.0471161 | 0                              | 0.7408901                     | -1.705788                   | 0.4535973            |
| hsa-miR-1538    | 0.0424969 | 0.0718045                      | NA                            | -0.106595                   | 0.1847088            |
| hsa-miR-154     | -0.263072 | -0.442356                      | 0.1386989                     | -1.107581                   | 0.1276477            |
| hsa-miR-154*    | 0.0788956 | 0.0995823                      | NA                            | 0.155329                    | 0.5531796            |
| hsa-miR-155     | 0.4624753 | 0.0602411                      | 0.3031338                     | 0.4950888                   | 0.518955             |
| hsa-miR-155*    | 0.3250098 | 0.1104389                      | 0.3186392                     | -1.140271                   | 0.7138035            |
| hsa-miR-1587    | 0.0322769 | 0.0277778                      | NA                            | -0.266595                   | 0.140682             |
| hsa-miR-15a     | -0.178485 | -0.638128                      | -0.062647                     | -0.213476                   | -0.141559            |
| hsa-miR-15a*    | 0.0024686 | 0.0670844                      | -0.643379                     | -1.482657                   | 0.5557095            |
| hsa-miR-15b     | -0.012204 | -0.424741                      | 0.0370843                     | -0.03124                    | -0.020776            |

Table S1 (continued)

**Table S1** (continued)

|                 | Quantile  | Median counts<br>normalization | Total counts<br>normalization | Trimmed mean of<br>M-values | Conditional quantile |
|-----------------|-----------|--------------------------------|-------------------------------|-----------------------------|----------------------|
| hsa-miR-15b*    | -0.273517 | -0.553646                      | 0.0782593                     | -0.390025                   | -0.100048            |
| hsa-miR-16      | -0.076451 | -0.593226                      | -0.036045                     | -0.162024                   | -0.039682            |
| hsa-miR-16-1*   | 0.0335874 | 0.016249                       | 0.2934523                     | -1.840001                   | 0.5388932            |
| hsa-miR-16-2*   | -0.100211 | -0.067084                      | 0.007067                      | -2.84033                    | 0.3865129            |
| hsa-miR-17      | 0.1113434 | -0.342158                      | 0.0897728                     | 0.0968735                   | 0.2558099            |
| hsa-miR-17*     | -0.061412 | -0.356088                      | -0.002138                     | -0.475747                   | 0.2139153            |
| hsa-miR-181a    | -0.22612  | -0.739307                      | -0.102418                     | -0.308323                   | -0.103099            |
| hsa-miR-181a*   | -0.190516 | -0.500261                      | -0.036714                     | -0.15012                    | 0.072693             |
| hsa-miR-181a-2* | -0.059715 | -0.444403                      | 0.0282665                     | -0.039345                   | -0.003238            |
| hsa-miR-181b    | 0.2112433 | -0.263527                      | 0.1232823                     | 0.1596305                   | 0.3355841            |
| hsa-miR-181c    | 0.0339036 | -0.402054                      | 0.0521178                     | 0.0187829                   | 0.1477917            |
| hsa-miR-181c*   | -0.289804 | -0.435593                      | 0.0902837                     | -1.029833                   | 0.0539344            |
| hsa-miR-181d    | 0.0762195 | -0.243244                      | 0.1975956                     | 0.0549813                   | 0.2116591            |
| hsa-miR-182     | 0.2199314 | -0.191659                      | 0.1612816                     | 0.2566338                   | 0.1992501            |
| hsa-miR-1825    | -0.026972 | -0.055556                      | 0.7632455                     | -2.895249                   | 0.0573487            |
| hsa-miR-1827    | -0.115981 | -0.25                          | 0.0342748                     | -3.522228                   | 0.138594             |
| hsa-miR-183     | 0.2261332 | 0.0530734                      | 0.3030421                     | 0.1371065                   | 0.4375585            |
| hsa-miR-183*    | 0.1185293 | 0.1666667                      | NA                            | 0.688453                    | 0.6893109            |
| hsa-miR-184     | 0.1372415 | 0.1829156                      | NA                            | 0.780952                    | 0.7529192            |
| hsa-miR-185     | -0.046941 | -0.322732                      | 0.1450103                     | -0.105584                   | 0.247272             |
| hsa-miR-185*    | 0.1006253 | 0.1111111                      | 0.1245372                     | -1.268743                   | 0.2240154            |
| hsa-miR-186     | -0.007642 | -0.468019                      | 0.0200335                     | -0.037074                   | -0.13106             |
| hsa-miR-186*    | 0.1516155 | 0.0555556                      | 0.6633586                     | -0.867383                   | 0.5781998            |
| hsa-miR-187     | -0.087453 | -0.127041                      | 0.0809065                     | -2.1594                     | 0.1983388            |
| hsa-miR-187*    | -0.071759 | -0.138889                      | -0.362105                     | -3.772769                   | -0.025985            |
| hsa-miR-188-3p  | 0.0061369 | -0.011529                      | 0.2100619                     | -2.208001                   | 0.3900086            |
| hsa-miR-188-5p  | 0.0113888 | -0.00944                       | -0.108678                     | -1.382287                   | 0.1857158            |
| hsa-miR-18a     | -0.439407 | -0.795598                      | -0.166359                     | -0.413682                   | -0.351724            |
| hsa-miR-18a*    | 0.1398963 | 0.0298663                      | 0.3893596                     | -0.88249                    | 0.4543474            |
| hsa-miR-18b     | 0.1409988 | 0.0529692                      | 0.3251841                     | -1.017665                   | 0.5078722            |
| hsa-miR-190     | 0.4428759 | 0.1691037                      | 0.2809062                     | 0.6606386                   | 0.8665468            |
| hsa-miR-1908    | 0.0952194 | 0.1388889                      | NA                            | 0.5847198                   | 0.2517932            |
| hsa-miR-1909*   | -0.043403 | -0.083333                      | NA                            | -3.506723                   | 0.0295709            |
| hsa-miR-190b    | 0.1537613 | 0.0833333                      | 0.3188519                     | -0.940262                   | 0.7592273            |
| hsa-miR-191     | 0.0107983 | -0.433538                      | 0.0419493                     | -0.001554                   | 0.1277245            |
| hsa-miR-191*    | -0.007162 | -0.067084                      | 0.3613818                     | -2.565931                   | 0.0458199            |
| hsa-miR-1911    | -0.067578 | -0.083333                      | NA                            | -3.594299                   | 0.3411477            |
| hsa-miR-1911*   | 0.09296   | 0                              | 1.1366553                     | -1.846                      | 0.2912447            |
| hsa-miR-1914    | 0.0115741 | 0.0277778                      | NA                            | -0.386914                   | 0.140682             |
| hsa-miR-1915    | -0.045491 | -0.111111                      | 0.5856881                     | -3.19192                    | 0.0017932            |

**Table S1** (continued)

Table S1 (continued)

|                 | Quantile  | Median counts<br>normalization | Total counts<br>normalization | Trimmed mean of<br>M-values | Conditional quantile |
|-----------------|-----------|--------------------------------|-------------------------------|-----------------------------|----------------------|
| hsa-miR-1915*   | 0.0104167 | 0.0277778                      | NA                            | -0.385619                   | 0.140682             |
| hsa-miR-192     | 0.0184764 | -0.614496                      | -0.048348                     | -0.182583                   | 0.0920101            |
| hsa-miR-192*    | -0.474283 | -0.760765                      | -0.09186                      | -0.539263                   | -0.16892             |
| hsa-miR-193a-3p | 0.0152475 | -0.362155                      | 0.0322576                     | 0.0447356                   | 0.2166007            |
| hsa-miR-193a-5p | 0.3434591 | 0.1125809                      | 0.3758553                     | 0.7078839                   | 0.4291683            |
| hsa-miR-193b    | -0.08989  | -0.531751                      | -0.008919                     | -0.102973                   | -0.171989            |
| hsa-miR-193b*   | 0.1027476 | 0.05928                        | 0.0496746                     | -0.766058                   | 0.3818396            |
| hsa-miR-194     | -0.560089 | -1.004701                      | -0.247261                     | -0.575149                   | -0.540156            |
| hsa-miR-194*    | -0.139939 | -0.533346                      | -0.146396                     | -0.132585                   | -0.340494            |
| hsa-miR-195     | 0.0582907 | -0.381464                      | 0.0663355                     | 0.0484333                   | 0.1087048            |
| hsa-miR-195*    | -0.427662 | -0.593372                      | -0.047067                     | -0.438809                   | -0.104746            |
| hsa-miR-196a    | 0.15476   | 0.0995823                      | 0.6288021                     | -0.7309                     | 0.4840674            |
| hsa-miR-196a*   | 0.0144676 | 0.0277778                      | NA                            | -0.383929                   | 0.5164029            |
| hsa-miR-196b    | -0.231648 | -0.222222                      | -0.027713                     | -3.15117                    | 0.300422             |
| hsa-miR-196b*   | 0.0115741 | 0.0277778                      | NA                            | -0.386797                   | 0.3503374            |
| hsa-miR-197     | -0.133713 | -0.50456                       | -0.02347                      | -0.11438                    | -0.170018            |
| hsa-miR-1972    | -0.068884 | -0.194444                      | 0.3785192                     | -2.88178                    | -0.08154             |
| hsa-miR-1973    | 0.0144676 | 0.0277778                      | NA                            | -0.383929                   | 0.5897014            |
| hsa-miR-1976    | 0.0503585 | 0.0555556                      | 0.2666304                     | -1.355845                   | 0.1684598            |
| hsa-miR-198     | 0.0194357 | 0.0277778                      | NA                            | -0.364046                   | 0.3503374            |
| hsa-miR-199a-3p | 0.1896886 | -0.265879                      | 0.1315183                     | 0.1658258                   | 0.1386466            |
| hsa-miR-199a-5p | 0.1053504 | -0.311044                      | 0.1101942                     | 0.1207526                   | 0.2049887            |
| hsa-miR-199b-3p | 0.1347386 | -0.263114                      | 0.1322399                     | 0.1681834                   | 0.126944             |
| hsa-miR-199b-5p | 0.3618198 | -0.032748                      | 0.3060777                     | 0.5674318                   | 0.4221548            |
| hsa-miR-19a     | 0.4885558 | 0.0051864                      | 0.2494654                     | 0.4404738                   | 0.5643334            |
| hsa-miR-19a*    | 0.0460674 | 0.0555556                      | NA                            | -0.03126                    | 0.5091529            |
| hsa-miR-19b     | 0.4686891 | 0.0105893                      | 0.2595822                     | 0.4432919                   | 0.3876225            |
| hsa-miR-19b-1*  | -0.128432 | -0.00472                       | -0.902961                     | -3.423161                   | 0.5621579            |
| hsa-miR-19b-2*  | -0.104521 | -0.055556                      | -0.986684                     | -4.501345                   | 0.3980418            |
| hsa-miR-200a    | 0.13336   | -0.234628                      | 0.1392569                     | 0.1889267                   | 0.1713723            |
| hsa-miR-200a*   | 0.1040826 | 0.0602757                      | 0.0843052                     | -1.011103                   | 0.5489008            |
| hsa-miR-200b    | 0.0369533 | -0.358687                      | 0.0843385                     | 0.08464                     | 0.062403             |
| hsa-miR-200b*   | -0.158439 | -0.097494                      | -0.392122                     | -3.214301                   | 0.4725099            |
| hsa-miR-200c    | 0.149394  | 0.1356714                      | 0.2154812                     | -0.921997                   | 0.5905744            |
| hsa-miR-200c*   | 0.0194357 | 0.0277778                      | NA                            | -0.364046                   | 0.5164029            |
| hsa-miR-202*    | 0.0517126 | 0.0555556                      | NA                            | -0.024224                   | 0.6634847            |
| hsa-miR-203     | -0.628916 | -1.013662                      | -0.289512                     | -0.644605                   | -0.691096            |
| hsa-miR-204     | 0.0579806 | -0.297958                      | 0.1048881                     | 0.1440284                   | 0.2407413            |
| hsa-miR-205     | -0.289496 | -0.354302                      | -0.573722                     | -5.397147                   | 0.1343227            |
| hsa-miR-2052    | 0.0736306 | 0.0555556                      | NA                            | 0.024092                    | 0.7529987            |

Table S1 (continued)



Table S1 (continued)

|                  | Quantile  | Median counts<br>normalization | Total counts<br>normalization | Trimmed mean of<br>M-values | Conditional quantile |
|------------------|-----------|--------------------------------|-------------------------------|-----------------------------|----------------------|
| hsa-miR-2054     | 0.0194357 | 0.0277778                      | NA                            | -0.364046                   | 0.7252209            |
| hsa-miR-206      | 0.0699039 | 0.0555556                      | NA                            | 0.0110972                   | 0.5781998            |
| hsa-miR-208a     | -0.040957 | -0.027778                      | -0.270984                     | -2.455536                   | 0.4258195            |
| hsa-miR-208b     | -0.213963 | -0.38585                       | -0.051677                     | -1.283258                   | 0.2220792            |
| hsa-miR-20a      | 0.1030578 | -0.309225                      | 0.1002825                     | 0.1224968                   | 0.1308074            |
| hsa-miR-20a*     | 0.029273  | -0.046613                      | 0.1627984                     | -1.235608                   | 0.4069842            |
| hsa-miR-20b      | 0.0110653 | -0.067715                      | 0.0181387                     | -1.600724                   | 0.4991626            |
| hsa-miR-20b*     | 0.0115741 | 0.0277778                      | NA                            | -0.387198                   | 0.5977814            |
| hsa-miR-21       | -0.041624 | -0.438935                      | 0.0375734                     | -0.007092                   | -0.012909            |
| hsa-miR-21*      | 0.1005343 | -0.35503                       | 0.0677272                     | 0.0743897                   | 0.0056573            |
| hsa-miR-210      | 0.3154221 | -0.100854                      | 0.2157964                     | 0.3352193                   | -0.047191            |
| hsa-miR-211      | -0.174985 | -0.233751                      | 0.1459796                     | -2.639799                   | 0.3362526            |
| hsa-miR-2110     | -0.005803 | -0.076525                      | 0.0310453                     | -1.678999                   | 0.0363796            |
| hsa-miR-2113     | -0.068593 | -0.083333                      | NA                            | -3.61354                    | 0.4815028            |
| hsa-miR-2114     | 0.070373  | 0.1111111                      | NA                            | 0.3969448                   | 0.5997363            |
| hsa-miR-2114*    | -0.076389 | -0.166667                      | NA                            | -4.263226                   | 0.2348708            |
| hsa-miR-2115     | 0.0523051 | 0.0555556                      | NA                            | -0.086573                   | 0.6255592            |
| hsa-miR-2115*    | 0.1320703 | 0.1111111                      | NA                            | 0.4089541                   | 0.6337554            |
| hsa-miR-2116     | 0.0649575 | 0.0277778                      | 0.7023165                     | -1.417722                   | 0.5926139            |
| hsa-miR-2116*    | 0.0625882 | 0.0922758                      | NA                            | -0.138003                   | 0.2874319            |
| hsa-miR-2117     | -0.028356 | -0.055556                      | -0.299906                     | -2.817713                   | 0.5092805            |
| hsa-miR-212      | 0.0878374 | -0.106586                      | 0.2789093                     | -0.629812                   | 0.2949513            |
| hsa-miR-214      | -0.319194 | -0.585778                      | -0.012983                     | -0.226773                   | -0.105478            |
| hsa-miR-214*     | -0.400859 | -0.618034                      | -0.010222                     | -0.600949                   | -0.128506            |
| hsa-miR-215      | -0.083666 | -0.590951                      | -0.037192                     | -0.159708                   | -0.192401            |
| hsa-miR-216a     | 0.5455105 | 0.4370047                      | 0.714621                      | 0.7316571                   | 0.9596489            |
| hsa-miR-216b     | 0.164838  | 0.0529692                      | 0.3058362                     | -0.885108                   | 0.4374543            |
| hsa-miR-217      | 0.1237637 | 0.159858                       | 0.2074708                     | -1.256425                   | 0.614761             |
| hsa-miR-218      | -0.27379  | -0.412109                      | 0.1765858                     | -0.30998                    | -0.008521            |
| hsa-miR-218-1*   | 0.0467445 | 0.0555556                      | NA                            | -0.00568                    | 0.5441807            |
| hsa-miR-219-1-3p | 0.1407251 | 0.143609                       | 0.4091641                     | -0.865468                   | 0.4661686            |
| hsa-miR-219-2-3p | -0.043403 | -0.083333                      | NA                            | -3.531009                   | 0.4393109            |
| hsa-miR-219-5p   | -0.332995 | -0.3868                        | -0.09123                      | -3.278597                   | 0.0167882            |
| hsa-miR-22       | -0.228015 | -0.741114                      | -0.1146                       | -0.309263                   | -0.390995            |
| hsa-miR-22*      | -0.21521  | -0.565104                      | 0.0371655                     | -0.337809                   | -0.177296            |
| hsa-miR-221      | 0.060675  | -0.334198                      | 0.0865893                     | 0.0939958                   | 0.3093589            |
| hsa-miR-221*     | 0.0138144 | 0.0225598                      | 0.1557354                     | -1.354482                   | 0.4761571            |
| hsa-miR-222      | 0.5623898 | 0.1455521                      | 0.3525114                     | 0.614417                    | 0.802092             |
| hsa-miR-222*     | -0.028935 | -0.055556                      | -0.108497                     | -2.830236                   | 0.514448             |
| hsa-miR-223      | 0.1987886 | -0.214329                      | 0.1841934                     | 0.2127103                   | 0.2228579            |

Table S1 (continued)

Table S1 (continued)

|                 | Quantile  | Median counts<br>normalization | Total counts<br>normalization | Trimmed mean of<br>M-values | Conditional quantile |
|-----------------|-----------|--------------------------------|-------------------------------|-----------------------------|----------------------|
| hsa-miR-223*    | 0.0544251 | -0.09064                       | 0.6060391                     | -1.829176                   | 0.2938453            |
| hsa-miR-224     | 0.2630815 | -0.159193                      | 0.2089744                     | 0.2149296                   | 0.410077             |
| hsa-miR-224*    | -0.067702 | -0.150418                      | 0.0159599                     | -2.492567                   | 0.3044853            |
| hsa-miR-2276    | -0.016204 | -0.055556                      | 0.628637                      | -2.639823                   | 0.267004             |
| hsa-miR-2277-3p | -0.053161 | -0.055556                      | 0.0296215                     | -3.74185                    | 0.0573487            |
| hsa-miR-2277-5p | 0.1578011 | 0.1153334                      | 0.2969031                     | -1.144929                   | 0.2316103            |
| hsa-miR-2278    | 0.0390246 | 0.0718045                      | NA                            | -0.125847                   | 0.3943641            |
| hsa-miR-2355-3p | 0.0185185 | 0.0277778                      | NA                            | -0.366171                   | 0.4122629            |
| hsa-miR-2355-5p | 0.2976274 | 0.2547201                      | 0.5307822                     | -0.088236                   | 0.6878348            |
| hsa-miR-2392    | -0.174323 | -0.42745                       | 0.180767                      | -0.2953                     | -0.173786            |
| hsa-miR-23a     | -0.06173  | -0.546702                      | -0.011319                     | -0.116401                   | 0.059415             |
| hsa-miR-23a*    | 0.030138  | 0.0277778                      | 0.1987696                     | -1.712742                   | 0.3503374            |
| hsa-miR-23b     | -0.210607 | -0.643642                      | -0.065451                     | -0.211867                   | -0.073213            |
| hsa-miR-23b*    | 0.0963584 | 0.0440267                      | 0.6878631                     | -1.324592                   | 0.6140303            |
| hsa-miR-23c     | -0.344235 | -0.447076                      | -0.175598                     | -3.018917                   | 0.0755682            |
| hsa-miR-24      | 0.0712166 | -0.399514                      | 0.0641662                     | 0.034974                    | 0.0371248            |
| hsa-miR-24-1*   | 0.1620052 | 0.0230576                      | 0.4416709                     | -0.973399                   | 0.5457019            |
| hsa-miR-24-2*   | -0.108638 | -0.171387                      | 0.1145204                     | -2.502705                   | 0.3986168            |
| hsa-miR-2467-3p | -0.037714 | -0.055556                      | 0.2168515                     | -2.825622                   | 0.0573487            |
| hsa-miR-2467-5p | -0.432582 | -0.608977                      | 0.0944639                     | -2.397194                   | -0.184496            |
| hsa-miR-25      | -0.125094 | -0.554776                      | -0.017204                     | -0.125276                   | -0.008207            |
| hsa-miR-25*     | -0.147021 | -0.303467                      | 0.3189037                     | -1.846351                   | 0.0980704            |
| hsa-miR-2681    | 0.0499661 | 0.0555556                      | NA                            | -0.070257                   | 0.4400407            |
| hsa-miR-2681*   | -0.035978 | -0.055556                      | 0.3786506                     | -2.844691                   | 0.514448             |
| hsa-miR-2682    | -0.043403 | -0.083333                      | NA                            | -3.506723                   | 0.3411477            |
| hsa-miR-2682*   | 0.0315998 | 0.0277778                      | NA                            | -0.305393                   | 0.140682             |
| hsa-miR-26a     | -0.262192 | -0.736444                      | -0.10494                      | -0.304574                   | -0.485283            |
| hsa-miR-26a-1*  | 0.1473443 | 0.0776628                      | 0.3876201                     | -1.136661                   | 0.600307             |
| hsa-miR-26a-2*  | -0.093122 | -0.282631                      | 0.2138114                     | -0.545709                   | 0.3252979            |
| hsa-miR-26b     | -0.291079 | -0.792669                      | -0.139499                     | -0.361187                   | -0.30812             |
| hsa-miR-26b*    | 0.082372  | -0.352505                      | -0.006981                     | -0.014993                   | 0.2224137            |
| hsa-miR-27a     | 0.1482273 | -0.318345                      | 0.0788371                     | 0.1172373                   | 0.1694664            |
| hsa-miR-27a*    | 0.0705584 | 0.0597779                      | 0.230918                      | -1.538588                   | 0.548403             |
| hsa-miR-27b     | -0.087287 | -0.516012                      | -0.005111                     | -0.084059                   | 0.0726132            |
| hsa-miR-27b*    | 0.0386635 | -0.36554                       | 0.1348621                     | -0.126911                   | 0.157104             |
| hsa-miR-28-3p   | -0.082263 | -0.571196                      | -0.030772                     | -0.140503                   | 0.0787839            |
| hsa-miR-28-5p   | -0.309156 | -0.75817                       | -0.127751                     | -0.34438                    | -0.33943             |
| hsa-miR-2861    | -0.008358 | -0.027778                      | 0.3015652                     | -2.262857                   | 0.0851265            |
| hsa-miR-2909    | 0.0488087 | 0.0555556                      | NA                            | -0.068602                   | 0.5959443            |
| hsa-miR-296-3p  | 0.0519784 | 0                              | 0.9103509                     | -1.667177                   | 0.1129043            |

Table S1 (continued)

**Table S1** (continued)

|                  | Quantile  | Median counts<br>normalization | Total counts<br>normalization | Trimmed mean of<br>M-values | Conditional quantile |
|------------------|-----------|--------------------------------|-------------------------------|-----------------------------|----------------------|
| hsa-miR-296-5p   | 0.201557  | 0.1991646                      | 0.4867933                     | -0.181304                   | 0.3120688            |
| hsa-miR-2964a-3p | -0.074092 | -0.048747                      | -0.401546                     | -2.273433                   | 0.3365825            |
| hsa-miR-2964a-5p | 0.0513741 | 0.0555556                      | NA                            | -0.029433                   | 0.6255592            |
| hsa-miR-297      | 0.0115741 | 0.0277778                      | NA                            | -0.386797                   | 0.4608924            |
| hsa-miR-299-3p   | 0.3728514 | 0.1396893                      | 0.4160604                     | 0.010849                    | 0.6623336            |
| hsa-miR-299-5p   | -0.107125 | -0.155138                      | -0.118198                     | -2.479779                   | 0.3675064            |
| hsa-miR-29a      | -0.089098 | -0.493988                      | 0.0119342                     | -0.06471                    | -0.157459            |
| hsa-miR-29a*     | 0.2311255 | 0.0417597                      | 0.1982707                     | -0.388547                   | 0.495357             |
| hsa-miR-29b      | 0.093091  | -0.34325                       | 0.0877881                     | 0.0731571                   | 0.1368209            |
| hsa-miR-29b-1*   | 0.0224389 | 0                              | 0.5303248                     | -1.775314                   | 0.3983192            |
| hsa-miR-29b-2*   | -0.025717 | -0.092774                      | 0.1302831                     | -1.683558                   | 0.47723              |
| hsa-miR-29c      | -0.020034 | -0.458436                      | 0.0286976                     | -0.033066                   | 0.0434127            |
| hsa-miR-29c*     | -0.140823 | -0.397507                      | 0.138768                      | -0.282063                   | 0.1724967            |
| hsa-miR-300      | -0.063172 | -0.027778                      | -0.532942                     | -3.902781                   | 0.4948665            |
| hsa-miR-301a     | 0.2788109 | -0.09101                       | 0.2116075                     | 0.3434899                   | 0.3255189            |
| hsa-miR-301b     | -0.300763 | -0.586572                      | -0.036806                     | -0.834782                   | -0.201242            |
| hsa-miR-302b     | 0.0335648 | 0.0555556                      | NA                            | -0.084378                   | 0.56589              |
| hsa-miR-302b*    | 0.0115741 | 0.0277778                      | NA                            | -0.387198                   | 0.4813751            |
| hsa-miR-302c     | -0.066467 | -0.290302                      | 0.4258636                     | -0.915192                   | 0.1646008            |
| hsa-miR-302d     | -0.038924 | -0.094862                      | 0.5083563                     | -3.068874                   | 0.2904672            |
| hsa-miR-302d*    | 0.0124421 | 0.0277778                      | NA                            | -0.390153                   | 0.550422             |
| hsa-miR-302e     | 0.0144676 | 0.0277778                      | NA                            | -0.383929                   | 0.4162018            |
| hsa-miR-302f     | -0.034722 | -0.083333                      | NA                            | -3.359804                   | 0.5776075            |
| hsa-miR-3064-3p  | 0.0376271 | 0.0277778                      | NA                            | -0.344587                   | 0.5946559            |
| hsa-miR-3064-5p  | -0.043403 | -0.083333                      | NA                            | -3.506723                   | 0.4570554            |
| hsa-miR-3065-3p  | 0.1375961 | 0.0021338                      | 0.1206407                     | -0.926653                   | 0.5690119            |
| hsa-miR-3065-5p  | -0.179429 | -0.52253                       | -0.097094                     | -0.298876                   | -0.1372              |
| hsa-miR-3074-3p  | 0.0955749 | 0.0718045                      | 0.7130749                     | -1.022627                   | 0.5604297            |
| hsa-miR-3074-5p  | -0.082361 | -0.434257                      | 0.0163116                     | 0.0059185                   | -0.048624            |
| hsa-miR-30a      | -0.013174 | -0.47983                       | 0.0196464                     | -0.047861                   | 0.0478137            |
| hsa-miR-30a*     | -0.328562 | -0.771302                      | -0.136174                     | -0.35281                    | -0.298613            |
| hsa-miR-30b      | -0.129944 | -0.532846                      | 0.0020207                     | -0.099523                   | -0.257664            |
| hsa-miR-30b*     | -0.038745 | -0.120551                      | 0.1228089                     | -1.750298                   | 0.4494522            |
| hsa-miR-30c      | 0.1348063 | -0.331406                      | 0.0897582                     | 0.1002532                   | 0.1372518            |
| hsa-miR-30c-1*   | -0.196743 | -0.413582                      | -0.069198                     | -0.724592                   | 0.0750427            |
| hsa-miR-30c-2*   | 0.1653507 | -0.277344                      | 0.1273571                     | 0.049537                    | 0.2960713            |
| hsa-miR-30d      | -0.003228 | -0.450494                      | 0.0313704                     | -0.018996                   | 0.1018553            |
| hsa-miR-30d*     | -0.66366  | -0.989977                      | -0.243217                     | -0.848754                   | -0.467333            |
| hsa-miR-30e      | 0.1686723 | -0.345566                      | 0.0874299                     | 0.0859614                   | 0.0122699            |
| hsa-miR-30e*     | -0.246371 | -0.699597                      | -0.096233                     | -0.27878                    | -0.103035            |

**Table S1** (continued)

Table S1 (continued)

|                 | Quantile  | Median counts<br>normalization | Total counts<br>normalization | Trimmed mean of<br>M-values | Conditional quantile |
|-----------------|-----------|--------------------------------|-------------------------------|-----------------------------|----------------------|
| hsa-miR-31      | -0.138039 | -0.243191                      | 0.3061334                     | -2.015777                   | 0.2971974            |
| hsa-miR-31*     | 0.0805176 | 0.0555556                      | NA                            | 0.0440144                   | 0.4400407            |
| hsa-miR-3115    | 0.0322769 | 0.0277778                      | NA                            | -0.278608                   | 0.530095             |
| hsa-miR-3116    | 0.0418481 | -0.027778                      | 0.4604748                     | -1.90301                    | 0.5422258            |
| hsa-miR-3117-3p | -0.090093 | -0.027778                      | -1.053737                     | -3.95289                    | 0.4053369            |
| hsa-miR-3118    | 0.0425952 | 0.0555556                      | NA                            | -0.043395                   | 0.6962369            |
| hsa-miR-3119    | -0.52701  | -0.905681                      | -0.200935                     | -0.518553                   | -0.518053            |
| hsa-miR-3120-3p | 0.2108675 | 0.2756892                      | 0.0101586                     | -0.561865                   | 0.8160779            |
| hsa-miR-3120-5p | -0.05766  | -0.199165                      | 0.3290503                     | -2.361458                   | 0.2023729            |
| hsa-miR-3121-3p | 0.0644554 | 0.0555556                      | NA                            | 0.0582505                   | 0.5091529            |
| hsa-miR-3122    | 0.0477431 | 0.0833333                      | NA                            | 0.1242683                   | 0.5719585            |
| hsa-miR-3123    | 0.0298637 | 0.0277778                      | NA                            | -0.286232                   | 0.6887186            |
| hsa-miR-3124-3p | -0.043403 | -0.083333                      | NA                            | -3.520975                   | 0.4866703            |
| hsa-miR-3124-5p | 0.0492011 | 0.0555556                      | NA                            | -0.071658                   | 0.2507116            |
| hsa-miR-3125    | -0.116095 | -0.083333                      | NA                            | -5.331477                   | 0.4866703            |
| hsa-miR-3126-3p | -0.034722 | -0.083333                      | NA                            | -3.359804                   | 0.4052918            |
| hsa-miR-3126-5p | -0.032986 | -0.083333                      | NA                            | -3.344104                   | 0.4052918            |
| hsa-miR-3127-3p | 0.0194357 | 0.0277778                      | NA                            | -0.364046                   | 0.140682             |
| hsa-miR-3127-5p | -0.032986 | -0.083333                      | NA                            | -3.344104                   | 0.4608426            |
| hsa-miR-3129-3p | 0.0300926 | 0.0555556                      | NA                            | -0.104261                   | 0.4400407            |
| hsa-miR-3130-3p | 0.0776068 | 0.1111111                      | NA                            | 0.4154783                   | 0.3062672            |
| hsa-miR-3130-5p | 0.0299734 | -0.027778                      | 1.0592408                     | -2.041512                   | 0.0851265            |
| hsa-miR-3131    | -0.023148 | -0.055556                      | 0.2956404                     | -2.792536                   | 0.1877689            |
| hsa-miR-3132    | 0.0709773 | 0.0555556                      | NA                            | 0.0301359                   | 0.5547475            |
| hsa-miR-3133    | -0.17506  | -0.138889                      | -0.393606                     | -4.152915                   | 0.5585542            |
| hsa-miR-3135    | -0.026129 | -0.055556                      | 0.087578                      | -2.511901                   | 0.267004             |
| hsa-miR-3135b   | 0.0614312 | -0.36273                       | 0.356857                      | 0.1907963                   | -0.233247            |
| hsa-miR-3136-3p | 0.0115741 | 0.0277778                      | NA                            | -0.38794                    | 0.550422             |
| hsa-miR-3136-5p | -0.048551 | -0.138889                      | 0.2882347                     | -2.651821                   | 0.3160141            |
| hsa-miR-3138    | -0.094723 | -0.055556                      | -0.617985                     | -4.473289                   | 0.4436364            |
| hsa-miR-3139    | 0.0032434 | -0.027778                      | 0.3903113                     | -2.295378                   | 0.5391003            |
| hsa-miR-3140-5p | 0.0231481 | 0.0555556                      | NA                            | -0.123522                   | 0.6178172            |
| hsa-miR-3141    | 0.0839376 | 0.1111111                      | NA                            | 0.3375674                   | 0.2240154            |
| hsa-miR-3143    | -0.039931 | -0.083333                      | NA                            | -3.488777                   | 0.3827928            |
| hsa-miR-3144-3p | 0.0081019 | 0                              | 0.3808781                     | -1.816653                   | 0.4535973            |
| hsa-miR-3144-5p | -0.068593 | -0.083333                      | NA                            | -3.61354                    | 0.3011518            |
| hsa-miR-3145-3p | -0.023036 | -0.055556                      | 0.0444275                     | -2.877115                   | 0.6098737            |
| hsa-miR-3145-5p | -0.080796 | -0.076525                      | -0.275728                     | -2.383744                   | 0.3770727            |
| hsa-miR-3146    | 0.0853767 | 0.0833333                      | NA                            | 0.2689546                   | 0.4678185            |
| hsa-miR-3147    | -0.12953  | -0.111111                      | -0.078622                     | -4.736028                   | 0.0559221            |

Table S1 (continued)

**Table S1** (continued)

|                  | Quantile  | Median counts<br>normalization | Total counts<br>normalization | Trimmed mean of<br>M-values | Conditional quantile |
|------------------|-----------|--------------------------------|-------------------------------|-----------------------------|----------------------|
| hsa-miR-3148     | 0.0115741 | 0.0277778                      | NA                            | -0.386914                   | 0.4122629            |
| hsa-miR-3150b-3p | 0.0271991 | 0.0555556                      | NA                            | -0.100658                   | 0.457093             |
| hsa-miR-3150b-5p | 0.0994175 | 0.0440267                      | 0.4207718                     | -1.478149                   | 0.156931             |
| hsa-miR-3151     | -0.068593 | -0.083333                      | NA                            | -3.61354                    | 0.1118227            |
| hsa-miR-3152-3p  | -0.188473 | -0.222222                      | -0.516684                     | -5.38998                    | 0.2313751            |
| hsa-miR-3152-5p  | 0.0315998 | 0.0277778                      | NA                            | -0.305393                   | 0.4122629            |
| hsa-miR-3153     | -0.051056 | -0.138889                      | 0.6747544                     | -3.684216                   | 0.405287             |
| hsa-miR-3154     | 0.0130208 | 0.0277778                      | NA                            | -0.386383                   | 0.3503374            |
| hsa-miR-3155b    | 0.0832397 | 0.0277778                      | 0.7745881                     | -1.446374                   | 0.140682             |
| hsa-miR-3156-5p  | 0.0482407 | 0.0277778                      | NA                            | -0.364627                   | 0.550422             |
| hsa-miR-3157-3p  | -0.001245 | 0.0555556                      | -0.368179                     | -1.587038                   | 0.5441807            |
| hsa-miR-3157-5p  | 0.0367782 | -0.083333                      | 0.6828455                     | -2.168144                   | 0.4061941            |
| hsa-miR-3158-3p  | 0.0207463 | 0.0277778                      | 0.112502                      | -1.630002                   | 0.3503374            |
| hsa-miR-3159     | 0.0101878 | -0.027778                      | 0.2012498                     | -2.275621                   | 0.5422258            |
| hsa-miR-3160-3p  | -0.012434 | -0.027778                      | 0.5349033                     | -2.433585                   | 0.5422258            |
| hsa-miR-3160-5p  | -0.044515 | -0.138889                      | 1.1618901                     | -3.72228                    | 0.3497363            |
| hsa-miR-3161     | -0.012382 | -0.055556                      | 0.6148379                     | -2.788825                   | 0.5113225            |
| hsa-miR-3162-3p  | -0.150792 | -0.243191                      | 0.1011324                     | -3.796595                   | -0.130287            |
| hsa-miR-3163     | -0.018519 | -0.055556                      | 0.254245                      | -2.65884                    | 0.3980418            |
| hsa-miR-3167     | -0.002289 | -0.055556                      | 0.9838867                     | -2.822265                   | 0.3980418            |
| hsa-miR-3168     | -0.018884 | -0.027778                      | 0.0858096                     | -2.419637                   | 0.5298667            |
| hsa-miR-3169     | 0.0315998 | 0.0277778                      | NA                            | -0.305393                   | 0.5977814            |
| hsa-miR-3170     | -0.115451 | -0.25                          | 0.0258606                     | -3.436324                   | 0.2386252            |
| hsa-miR-3173-3p  | -0.043403 | -0.083333                      | NA                            | -3.520975                   | 0.4866703            |
| hsa-miR-3173-5p  | 0.018857  | 0.0277778                      | 0.0664146                     | -1.697154                   | 0.5977814            |
| hsa-miR-3174     | -0.244332 | -0.652948                      | 0.5286884                     | -0.692956                   | -0.08607             |
| hsa-miR-3176     | 0.0759311 | 0.0833333                      | NA                            | 0.2918653                   | 0.1962376            |
| hsa-miR-3177-3p  | -0.015914 | -0.027778                      | -0.315048                     | -2.366728                   | 0.0851265            |
| hsa-miR-3178     | 0.0260417 | 0.0555556                      | NA                            | -0.121878                   | 0.1684598            |
| hsa-miR-3180-3p  | 0.0479427 | -0.206807                      | 0.2414182                     | -0.505301                   | -0.129662            |
| hsa-miR-3182     | 0.1611062 | 0.0230576                      | 0.291363                      | -0.625426                   | 0.5807022            |
| hsa-miR-3183     | 0.0231481 | 0.0555556                      | NA                            | -0.125787                   | 0.1684598            |
| hsa-miR-3184     | 0.2417335 | 0.0235178                      | 0.1492859                     | -0.129142                   | 0.377937             |
| hsa-miR-3185     | -0.039931 | -0.083333                      | NA                            | -3.488777                   | 0.0295709            |
| hsa-miR-3186-5p  | -0.043403 | -0.083333                      | NA                            | -3.506723                   | 0.2392263            |
| hsa-miR-3187-5p  | 0.0315998 | 0.0277778                      | NA                            | -0.323107                   | 0.140682             |
| hsa-miR-3188     | -0.039931 | -0.083333                      | NA                            | -3.488777                   | 0.1599911            |
| hsa-miR-3189-3p  | 0.0115741 | 0.0277778                      | NA                            | -0.386797                   | 0.2229339            |
| hsa-miR-3189-5p  | 0.0438509 | 0.0555556                      | NA                            | 0.002373                    | 0.1684598            |
| hsa-miR-3190     | 0.0709773 | 0.0555556                      | NA                            | 0.0301359                   | 0.4800366            |

**Table S1** (continued)

Table S1 (continued)

|                 | Quantile  | Median counts<br>normalization | Total counts<br>normalization | Trimmed mean of<br>M-values | Conditional quantile |
|-----------------|-----------|--------------------------------|-------------------------------|-----------------------------|----------------------|
| hsa-miR-3191    | -0.124089 | -0.138889                      | -0.469335                     | -3.905                      | -0.025985            |
| hsa-miR-3192    | -0.183519 | -0.25                          | 0.2201587                     | -4.375543                   | 0.2941759            |
| hsa-miR-3193    | 0.0274506 | 0.0277778                      | NA                            | -0.32362                    | 0.5164029            |
| hsa-miR-3194-3p | -0.065274 | -0.104302                      | -0.273487                     | -2.913018                   | 0.2182572            |
| hsa-miR-3194-5p | -0.179207 | -0.347494                      | 0.2175646                     | -2.197253                   | -0.234589            |
| hsa-miR-3195    | 0.0456339 | -0.039307                      | 0.8246377                     | -1.980554                   | 0.0735977            |
| hsa-miR-3196    | 0.0283565 | 0.0555556                      | NA                            | -0.10299                    | 0.1684598            |
| hsa-miR-3197    | -0.043403 | -0.083333                      | NA                            | -3.506723                   | 0.0295709            |
| hsa-miR-3199    | 0.0895563 | 0.0555556                      | 0.5029636                     | -1.203964                   | 0.6224336            |
| hsa-miR-32      | 0.0829985 | -0.313295                      | 0.0808757                     | 0.0929646                   | 0.2946208            |
| hsa-miR-32*     | -0.128501 | -0.171387                      | 0.1502217                     | -2.263536                   | 0.5260563            |
| hsa-miR-3200-3p | -0.094831 | -0.25472                       | 0.3188078                     | -2.280658                   | 0.0678395            |
| hsa-miR-3200-5p | 0.0131873 | 0                              | 0.0131069                     | -2.929725                   | 0.5700036            |
| hsa-miR-3201    | -0.005011 | -0.055556                      | 0.815774                      | -2.791066                   | 0.6053853            |
| hsa-miR-320a    | 0.0891734 | -0.37736                       | 0.0747496                     | 0.0472256                   | 0.0216126            |
| hsa-miR-320b    | 0.0746135 | -0.170112                      | 0.0671582                     | -0.133818                   | 0.3998914            |
| hsa-miR-320c    | 0.3486026 | 0.2893066                      | 0.3781218                     | -0.111665                   | 0.8593102            |
| hsa-miR-320d    | 0.0799348 | 0.0277778                      | 0.3686607                     | -1.404014                   | 0.5897014            |
| hsa-miR-323-3p  | -0.065429 | -0.205973                      | 0.421769                      | -2.446969                   | 0.3364307            |
| hsa-miR-323-5p  | 0.0231481 | 0.0555556                      | NA                            | -0.125787                   | 0.1684598            |
| hsa-miR-323b-3p | -0.133681 | -0.215414                      | 0.3011108                     | -3.316678                   | 0.2732116            |
| hsa-miR-323b-5p | 0.0406302 | 0                              | 0.6624746                     | -1.606368                   | 0.424481             |
| hsa-miR-324-3p  | -0.055435 | -0.215911                      | 0.2470562                     | -0.792591                   | -0.106628            |
| hsa-miR-324-5p  | -0.292673 | -0.752152                      | -0.166834                     | -0.481918                   | -0.569673            |
| hsa-miR-326     | -0.024481 | -0.247414                      | 0.233806                      | -0.16721                    | -0.13813             |
| hsa-miR-328     | 0.8076171 | 0.3886497                      | 0.5174449                     | 0.9998683                   | 0.5264839            |
| hsa-miR-329     | 0.0279344 | -0.00472                       | 0.0211296                     | -1.859875                   | 0.379765             |
| hsa-miR-330-3p  | 0.0859937 | 0.1456976                      | -0.292396                     | -0.972897                   | 0.389022             |
| hsa-miR-330-5p  | -0.105957 | -0.256854                      | 0.1942692                     | -1.110803                   | 0.0657057            |
| hsa-miR-331-3p  | -0.256942 | -0.551677                      | 0.0038007                     | -0.174487                   | -0.378525            |
| hsa-miR-331-5p  | -0.463683 | -0.597494                      | -0.678583                     | -3.99254                    | -0.274934            |
| hsa-miR-335     | 0.0875507 | -0.2855                        | 0.1133228                     | 0.1333665                   | 0.5124857            |
| hsa-miR-335*    | -0.170916 | -0.525808                      | -0.029945                     | -0.135746                   | -0.07028             |
| hsa-miR-337-3p  | -0.270094 | -0.478578                      | -0.015892                     | -1.129268                   | -0.094093            |
| hsa-miR-337-5p  | 0.1061183 | 0.1273601                      | 0.1176746                     | -1.117606                   | 0.6921962            |
| hsa-miR-338-3p  | -0.380566 | -0.684074                      | 0.0072335                     | -0.750151                   | -0.299589            |
| hsa-miR-338-5p  | 0.3253548 | 0.2385958                      | 0.1076226                     | -0.703856                   | 0.76124              |
| hsa-miR-339-3p  | 0.0669526 | -0.329742                      | 0.0193005                     | 0.0208443                   | -0.219195            |
| hsa-miR-339-5p  | 0.654138  | 0.2957154                      | 0.2970358                     | 0.732625                    | 0.4102867            |
| hsa-miR-33a     | -0.090686 | -0.309661                      | 0.1053136                     | -0.933551                   | 0.1234534            |

Table S1 (continued)

**Table S1** (continued)

|                 | Quantile  | Median counts<br>normalization | Total counts<br>normalization | Trimmed mean of<br>M-values | Conditional quantile |
|-----------------|-----------|--------------------------------|-------------------------------|-----------------------------|----------------------|
| hsa-miR-33a*    | 0.1481507 | 0.0393518                      | 0.323054                      | -0.328062                   | 0.5619961            |
| hsa-miR-33b     | -0.076565 | -0.409863                      | 0.1054652                     | -0.040227                   | 0.1691024            |
| hsa-miR-33b*    | 0.2262509 | 0.1530493                      | 0.4927226                     | -1.001357                   | 0.2659536            |
| hsa-miR-340     | -0.184001 | -0.59757                       | -0.042202                     | -0.167492                   | -0.00256             |
| hsa-miR-340*    | -0.457096 | -0.702237                      | -0.090686                     | -0.713261                   | -0.317752            |
| hsa-miR-342-3p  | 0.5170791 | 0.0277815                      | 0.2707206                     | 0.4571854                   | 0.5844624            |
| hsa-miR-342-5p  | 0.1278284 | 0.1158313                      | -0.092045                     | -0.732359                   | 0.6806673            |
| hsa-miR-345     | 0.0119382 | -0.413763                      | 0.0379124                     | -0.021658                   | -0.385431            |
| hsa-miR-346     | 0.0044008 | -0.027778                      | 0.1152174                     | -2.158249                   | 0.0851265            |
| hsa-miR-34a     | 0.6217391 | 0.3089684                      | 0.4278732                     | 0.8225401                   | 0.9609876            |
| hsa-miR-34a*    | 0.1282474 | 0.143609                       | 0.1201641                     | -0.988071                   | 0.6662533            |
| hsa-miR-34b*    | -0.034722 | -0.083333                      | NA                            | -3.359804                   | 0.3715697            |
| hsa-miR-34c-3p  | 0.1500115 | 0.1158313                      | 0.735556                      | -0.964503                   | 0.6085184            |
| hsa-miR-34c-5p  | 0.0321812 | -0.055556                      | 0.425932                      | -2.195506                   | 0.5113225            |
| hsa-miR-3529    | 0.0576415 | 0.0833333                      | NA                            | 0.1695514                   | 0.4678185            |
| hsa-miR-3545-3p | -0.067578 | -0.083333                      | NA                            | -3.594299                   | 0.301996             |
| hsa-miR-3545-5p | -0.102741 | -0.255351                      | 0.2226497                     | -0.420205                   | 0.1982461            |
| hsa-miR-3591-3p | -0.22895  | -0.673902                      | -0.095125                     | -0.241929                   | -0.180206            |
| hsa-miR-3591-5p | -0.145281 | -0.582924                      | -0.033462                     | -0.147336                   | -0.007535            |
| hsa-miR-3605-3p | -0.000529 | -0.094862                      | 0.3967133                     | -2.456906                   | 0.3296189            |
| hsa-miR-3605-5p | -0.031273 | -0.020969                      | -0.187651                     | -1.944654                   | 0.5232068            |
| hsa-miR-3606    | 0.039098  | 0.0440267                      | NA                            | -0.363096                   | 0.7414699            |
| hsa-miR-3607-3p | -0.201293 | -0.40314                       | 0.0595785                     | -0.399943                   | -0.02372             |
| hsa-miR-3607-5p | -0.04919  | -0.138889                      | 0.6275362                     | -3.488559                   | 0.2455962            |
| hsa-miR-3609    | -0.000423 | 0                              | 0.0488187                     | -2.079894                   | 0.3983192            |
| hsa-miR-361-3p  | -0.188524 | -0.56764                       | -0.054636                     | -0.194819                   | 0.0092603            |
| hsa-miR-361-5p  | -0.280482 | -0.664378                      | -0.08879                      | -0.250141                   | -0.123609            |
| hsa-miR-3611    | 0.1020544 | 0.143609                       | NA                            | 0.3814338                   | 0.8410521            |
| hsa-miR-3613-3p | -0.173555 | -0.30864                       | 0.22444                       | -1.251036                   | 0.1098851            |
| hsa-miR-3613-5p | -0.320412 | -0.674757                      | -0.193769                     | -0.353872                   | 0.0226862            |
| hsa-miR-3614-3p | -0.004409 | 0                              | -0.053836                     | -2.082814                   | 0.3853293            |
| hsa-miR-3614-5p | -0.037619 | -0.191405                      | 0.1816563                     | -1.600676                   | 0.051919             |
| hsa-miR-3615    | 0.0360937 | -0.179698                      | 0.1195614                     | -0.738925                   | -0.066794            |
| hsa-miR-3616-3p | 0.0310211 | 0.0277778                      | NA                            | -0.286016                   | 0.4522588            |
| hsa-miR-3616-5p | -0.102808 | -0.166667                      | NA                            | -4.322403                   | 0.2869306            |
| hsa-miR-3617    | 0.0435124 | 0.0555556                      | NA                            | -0.053006                   | 0.4400407            |
| hsa-miR-3619-3p | -0.04836  | -0.111111                      | 0.3748791                     | -3.184443                   | 0.0017932            |
| hsa-miR-3619-5p | 0.0684789 | 0.0555556                      | NA                            | 0.0614872                   | 0.1684598            |
| hsa-miR-362-3p  | -0.013953 | -0.099582                      | 0.0543048                     | -1.037393                   | 0.354015             |
| hsa-miR-362-5p  | 0.475806  | 0.1184788                      | 0.2271094                     | 0.7237278                   | 0.651408             |

**Table S1** (continued)

**Table S1** (continued)

|                  | Quantile  | Median counts<br>normalization | Total counts<br>normalization | Trimmed mean of<br>M-values | Conditional quantile |
|------------------|-----------|--------------------------------|-------------------------------|-----------------------------|----------------------|
| hsa-miR-3620     | 0.05346   | 0.0555556                      | 0.069378                      | -1.266808                   | 0.1684598            |
| hsa-miR-3622a-3p | 0.0570628 | 0.0833333                      | NA                            | 0.201832                    | 0.4058929            |
| hsa-miR-3622a-5p | -0.09221  | -0.13208                       | -0.096281                     | -2.982566                   | -0.019176            |
| hsa-miR-3622b-3p | -0.01494  | -0.094862                      | 0.7985829                     | -3.07533                    | 0.0180421            |
| hsa-miR-3622b-5p | 0.0822969 | 0.0833333                      | NA                            | 0.3168086                   | 0.3660694            |
| hsa-miR-363      | -0.256595 | -0.649593                      | -0.133633                     | -0.403028                   | -0.265108            |
| hsa-miR-363*     | 0.0040963 | -0.055556                      | 1.485595                      | -2.651851                   | 0.514448             |
| hsa-miR-3647-3p  | -0.056634 | -0.106391                      | -0.224659                     | -1.234861                   | 0.5342904            |
| hsa-miR-3648     | 0.0150463 | 0.0277778                      | NA                            | -0.366916                   | 0.140682             |
| hsa-miR-365      | -0.031951 | -0.44904                       | 0.0270424                     | -0.026181                   | 0.2383326            |
| hsa-miR-365*     | -0.007365 | -0.178195                      | 0.3926691                     | -2.077097                   | 0.1443641            |
| hsa-miR-3650     | 0.0144676 | 0.0277778                      | NA                            | -0.383929                   | 0.5632945            |
| hsa-miR-3651     | -0.026851 | -0.150418                      | 0.5693231                     | -2.914273                   | 0.2040015            |
| hsa-miR-3652     | -0.055201 | -0.055556                      | -0.069326                     | -2.578164                   | 0.0573487            |
| hsa-miR-3653     | -0.034722 | -0.083333                      | NA                            | -3.359804                   | 0.3052607            |
| hsa-miR-3654     | 0.0104167 | 0.0277778                      | NA                            | -0.385619                   | 0.5632945            |
| hsa-miR-3655     | -0.039931 | -0.083333                      | NA                            | -3.488777                   | 0.1118227            |
| hsa-miR-3656     | 0.0310211 | 0.0277778                      | NA                            | -0.314959                   | 0.140682             |
| hsa-miR-3657     | 0.0757893 | 0.0833333                      | NA                            | 0.2531714                   | 0.4869218            |
| hsa-miR-3658     | 0.0115741 | 0.0277778                      | NA                            | -0.386914                   | 0.6357069            |
| hsa-miR-3659     | 0.0115741 | 0.0277778                      | NA                            | -0.386797                   | 0.5681665            |
| hsa-miR-3660     | 0.0115741 | 0.0277778                      | NA                            | -0.38794                    | 0.4608924            |
| hsa-miR-3661     | 0.0526876 | 0.0555556                      | NA                            | -0.086102                   | 0.1684598            |
| hsa-miR-3662     | -0.039931 | -0.083333                      | NA                            | -3.488777                   | 0.3351915            |
| hsa-miR-3663-5p  | 0.0115741 | 0.0277778                      | NA                            | -0.386797                   | 0.140682             |
| hsa-miR-3664-3p  | 0.038283  | 0.0277778                      | 0.1782218                     | -1.886696                   | 0.4122629            |
| hsa-miR-3664-5p  | -0.138665 | -0.138889                      | -0.472554                     | -5.005177                   | 0.2455962            |
| hsa-miR-3666     | 0.0115741 | 0.0277778                      | NA                            | -0.386797                   | 0.5681665            |
| hsa-miR-3667-3p  | 0.0561613 | 0.016249                       | 0.7591462                     | -1.803339                   | 0.5862526            |
| hsa-miR-3669     | 0.0274506 | 0.0277778                      | NA                            | -0.32362                    | 0.6684591            |
| hsa-miR-367      | 0.0115741 | 0.0277778                      | NA                            | -0.385569                   | 0.4813751            |
| hsa-miR-3670     | 0.0594268 | 0.0833333                      | NA                            | 0.1665698                   | 0.6533369            |
| hsa-miR-3671     | -0.039931 | -0.083333                      | NA                            | -3.488777                   | 0.370264             |
| hsa-miR-3672     | 0.0790213 | 0.0833333                      | NA                            | 0.3150397                   | 0.7240147            |
| hsa-miR-3674     | -0.039931 | -0.083333                      | NA                            | -3.488777                   | 0.3011518            |
| hsa-miR-3675-5p  | 0.0115741 | 0.0277778                      | NA                            | -0.387198                   | 0.4826808            |
| hsa-miR-3676     | -0.003472 | 0                              | -0.049704                     | -2.02365                    | 0.282736             |
| hsa-miR-3677-3p  | 0.0376157 | 0.0833333                      | NA                            | 0.0895408                   | 0.1962376            |
| hsa-miR-3677-5p  | 0.0089024 | -0.011529                      | 0.254853                      | -2.224752                   | 0.1013754            |
| hsa-miR-3678-3p  | -0.048709 | -0.111111                      | 0.7037043                     | -3.346715                   | 0.2142684            |

**Table S1** (continued)



**Table S1** (continued)

|                  | Quantile  | Median counts<br>normalization | Total counts<br>normalization | Trimmed mean of<br>M-values | Conditional quantile |
|------------------|-----------|--------------------------------|-------------------------------|-----------------------------|----------------------|
| hsa-miR-3678-5p  | -0.049059 | -0.055556                      | -0.030578                     | -2.904319                   | 0.514448             |
| hsa-miR-3679-3p  | -0.021412 | -0.055556                      | 0.1031852                     | -2.664582                   | 0.514448             |
| hsa-miR-3679-5p  | -0.073032 | -0.104302                      | 0.0505416                     | -2.972908                   | 0.3201786            |
| hsa-miR-3680     | 0.0425952 | 0.0555556                      | NA                            | -0.01744                    | 0.6255592            |
| hsa-miR-3680*    | 0.0428846 | 0.0555556                      | NA                            | -0.015531                   | 0.5997315            |
| hsa-miR-3681     | -0.077071 | -0.027778                      | -0.60124                      | -3.885891                   | 0.5422258            |
| hsa-miR-3681*    | 0.0298637 | 0.0277778                      | NA                            | -0.286232                   | 0.550422             |
| hsa-miR-3682-3p  | -0.018519 | -0.055556                      | 0.254245                      | -2.65884                    | 0.5092805            |
| hsa-miR-3682-5p  | 0.1287507 | 0.1111111                      | NA                            | 0.4458879                   | 0.5647084            |
| hsa-miR-3683     | 0.0274506 | 0.0277778                      | NA                            | -0.32362                    | 0.4122629            |
| hsa-miR-3684     | 0.0411136 | 0.0277778                      | NA                            | -0.358876                   | 0.4608924            |
| hsa-miR-3686     | 0.0058324 | -0.055556                      | 1.5098361                     | -2.635093                   | 0.6418876            |
| hsa-miR-3687     | 0.0576415 | 0.0833333                      | NA                            | 0.2193026                   | 0.1962376            |
| hsa-miR-3688-3p  | -0.071345 | -0.083333                      | NA                            | -3.628066                   | 0.3011518            |
| hsa-miR-3688-5p  | 0.1751429 | 0.1944444                      | NA                            | 1.1113544                   | 0.5980329            |
| hsa-miR-3689a-5p | 0.0134544 | -0.055556                      | 1.426206                      | -2.794457                   | 0.4670887            |
| hsa-miR-3689b*   | -0.034722 | -0.083333                      | NA                            | -3.359804                   | 0.4866703            |
| hsa-miR-3689d    | 0.0245274 | -0.027778                      | 1.0842843                     | -2.137119                   | 0.2947818            |
| hsa-miR-3689f    | 0.0130208 | 0.0277778                      | NA                            | -0.386383                   | 0.5977814            |
| hsa-miR-369-3p   | -0.364461 | -0.463815                      | 0.0159632                     | -0.883535                   | 0.2336278            |
| hsa-miR-369-5p   | -0.208899 | -0.222222                      | -0.037822                     | -2.648829                   | 0.300422             |
| hsa-miR-3690     | -0.039931 | -0.083333                      | NA                            | -3.488777                   | 0.3411477            |
| hsa-miR-3691-3p  | 0.0185185 | 0.0277778                      | NA                            | -0.366171                   | 0.5164029            |
| hsa-miR-3691-5p  | 0.0949641 | 0.0833333                      | NA                            | 0.2202788                   | 0.6275092            |
| hsa-miR-3692     | 0.0167824 | 0.0277778                      | NA                            | -0.363828                   | 0.5977814            |
| hsa-miR-3692*    | -0.121125 | -0.138889                      | -0.036692                     | -3.899537                   | 0.2155304            |
| hsa-miR-370      | 0.2716037 | 0.1368003                      | 0.5179558                     | -0.611219                   | 0.2497046            |
| hsa-miR-371-3p   | 0.0310211 | 0.0277778                      | NA                            | -0.286016                   | 0.5946559            |
| hsa-miR-371-5p   | -0.001447 | 0                              | 0.0198886                     | -1.990265                   | 0.4751706            |
| hsa-miR-3713     | -0.043403 | -0.083333                      | NA                            | -3.520975                   | 0.3918373            |
| hsa-miR-371b-3p  | 0.0728356 | 0.0995823                      | NA                            | 0.1852216                   | 0.5240633            |
| hsa-miR-371b-5p  | 0.0575256 | 0                              | 0.8971914                     | -1.939694                   | 0.5226443            |
| hsa-miR-372      | -0.05674  | -0.094862                      | 0.1864304                     | -3.043136                   | 0.4720159            |
| hsa-miR-373      | -0.051935 | -0.115831                      | 0.204961                      | -2.047915                   | 0.4510468            |
| hsa-miR-374a     | 0.0197719 | -0.338874                      | 0.0825304                     | 0.0943014                   | 0.4041067            |
| hsa-miR-374a*    | -0.189686 | -0.605166                      | -0.051652                     | -0.187034                   | 0.0985581            |
| hsa-miR-374b     | -0.124395 | -0.510148                      | -0.003993                     | -0.136608                   | 0.1070278            |
| hsa-miR-374b*    | -0.116976 | -0.259121                      | 0.1509838                     | -1.060308                   | 0.3488082            |
| hsa-miR-374c     | 0.0104167 | 0.0277778                      | NA                            | -0.385619                   | 0.4813751            |
| hsa-miR-375      | -0.634872 | -1.055209                      | -0.216659                     | -0.650701                   | -0.604586            |

**Table S1** (continued)

Table S1 (continued)

|                 | Quantile  | Median counts<br>normalization | Total counts<br>normalization | Trimmed mean of<br>M-values | Conditional quantile |
|-----------------|-----------|--------------------------------|-------------------------------|-----------------------------|----------------------|
| hsa-miR-376a    | 0.0645182 | -0.207804                      | 0.3889089                     | -0.599261                   | 0.1957841            |
| hsa-miR-376a*   | 0.0984545 | 0.0440267                      | 0.2731452                     | -1.422165                   | 0.497624             |
| hsa-miR-376b    | -0.022346 | -0.134169                      | 0.2931372                     | -1.664922                   | 0.4737604            |
| hsa-miR-376c    | 0.2065945 | -0.133448                      | 0.151351                      | 0.4708708                   | 0.2727884            |
| hsa-miR-377     | -0.177951 | -0.299199                      | 0.1649022                     | -0.998507                   | 0.1543978            |
| hsa-miR-377*    | -0.070298 | -0.161947                      | 0.3389519                     | -2.313755                   | 0.4080571            |
| hsa-miR-378     | -0.168995 | -0.607097                      | -0.044446                     | -0.176047                   | -0.045807            |
| hsa-miR-378*    | -0.113228 | -0.497815                      | -0.002355                     | -0.259673                   | -0.244341            |
| hsa-miR-378b    | -0.089353 | -0.222222                      | 1.4016232                     | -4.111096                   | 0.3216503            |
| hsa-miR-378c    | -0.004033 | -0.411919                      | 0.0520343                     | -0.033218                   | 0.1490774            |
| hsa-miR-378d    | -0.261644 | -0.520184                      | -0.02342                      | -0.307702                   | -0.011522            |
| hsa-miR-378e    | -0.020848 | -0.104302                      | 0.3724116                     | -2.199204                   | 0.4285601            |
| hsa-miR-378f    | -0.115403 | -0.134169                      | 0.0153596                     | -2.347098                   | 0.3472816            |
| hsa-miR-378g    | -0.184081 | -0.386755                      | 0.2292869                     | -1.600467                   | 0.0884155            |
| hsa-miR-378h    | -0.510728 | -0.582383                      | -0.347661                     | -3.051486                   | -0.041994            |
| hsa-miR-378i    | 0.2255454 | 0.2038847                      | 0.5879127                     | -0.672135                   | 0.7442734            |
| hsa-miR-379     | -0.148917 | -0.256037                      | 0.0740754                     | -1.04774                    | 0.3087993            |
| hsa-miR-379*    | 0.1425596 | 0.1388889                      | 0.6240104                     | -0.395631                   | 0.5924862            |
| hsa-miR-380     | -0.000922 | -0.055556                      | 0.1642977                     | -2.131873                   | 0.5523736            |
| hsa-miR-381     | -0.134374 | -0.532211                      | -0.026858                     | -0.111635                   | 0.0086463            |
| hsa-miR-382     | -0.048384 | -0.241058                      | 0.2496061                     | -1.270409                   | 0.3289461            |
| hsa-miR-383     | -0.109873 | -0.178195                      | 0.1277023                     | -1.737334                   | 0.3444488            |
| hsa-miR-384     | 0.0411136 | 0.0277778                      | NA                            | -0.359298                   | 0.7252209            |
| hsa-miR-3907    | 0.0829809 | 0.0718045                      | NA                            | 0.0249053                   | 0.1847088            |
| hsa-miR-3908    | -0.002289 | -0.055556                      | 1.092941                      | -2.832267                   | 0.3289296            |
| hsa-miR-3909    | -0.106274 | -0.21137                       | 0.1289187                     | -0.725378                   | 0.1111899            |
| hsa-miR-3911    | 0.1233635 | 0.0995823                      | NA                            | 0.3377472                   | 0.4221419            |
| hsa-miR-3912    | -0.227944 | -0.461379                      | 0.1202488                     | -1.32377                    | 0.1008827            |
| hsa-miR-3913-3p | 0.0802039 | 0.0277778                      | 0.9170777                     | -1.293745                   | 0.4122629            |
| hsa-miR-3913-5p | -0.400678 | -0.38208                       | -0.412699                     | -5.661812                   | 0.0024049            |
| hsa-miR-3914    | -0.031829 | -0.055556                      | -0.259557                     | -2.835971                   | 0.3980418            |
| hsa-miR-3916    | -0.028356 | -0.055556                      | -0.082242                     | -2.815926                   | 0.4850772            |
| hsa-miR-3917    | 0.0115741 | 0.0277778                      | NA                            | -0.385569                   | 0.140682             |
| hsa-miR-3918    | 0.0310211 | 0.0277778                      | NA                            | -0.287335                   | 0.2229339            |
| hsa-miR-3919    | 0.0115741 | 0.0277778                      | NA                            | -0.387198                   | 0.5926139            |
| hsa-miR-3920    | 0.044042  | 0.0555556                      | NA                            | -0.03779                    | 0.6634847            |
| hsa-miR-3921    | -0.056512 | -0.055556                      | -0.492649                     | -2.925012                   | 0.3993475            |
| hsa-miR-3922-3p | -0.242831 | -0.333333                      | NA                            | -5.909467                   | 0.1893109            |
| hsa-miR-3922-5p | 0.0115741 | 0.0277778                      | NA                            | -0.38794                    | 0.2711022            |
| hsa-miR-3923    | -0.028356 | -0.055556                      | 0.1529086                     | -2.83974                    | 0.3980418            |

Table S1 (continued)

**Table S1** (continued)

|                 | Quantile  | Median counts<br>normalization | Total counts<br>normalization | Trimmed mean of<br>M-values | Conditional quantile |
|-----------------|-----------|--------------------------------|-------------------------------|-----------------------------|----------------------|
| hsa-miR-3924    | 0.0526876 | 0.0555556                      | NA                            | -0.085279                   | 0.6634847            |
| hsa-miR-3925-3p | 0.03125   | 0.0555556                      | NA                            | -0.098963                   | 0.4591441            |
| hsa-miR-3925-5p | 0.0067156 | -0.027778                      | 0.4981681                     | -2.111424                   | 0.4948665            |
| hsa-miR-3927    | 0.0411136 | 0.0277778                      | NA                            | -0.359298                   | 0.4813751            |
| hsa-miR-3928    | 0.0007179 | -0.060276                      | 0.2858405                     | -2.235131                   | 0.0526286            |
| hsa-miR-3929    | 0.0104167 | 0.0277778                      | NA                            | -0.385619                   | 0.5719537            |
| hsa-miR-3934    | 0.0438509 | 0.0718045                      | NA                            | -0.126713                   | 0.5604297            |
| hsa-miR-3935    | 0.0322769 | 0.0277778                      | NA                            | -0.278608                   | 0.5164029            |
| hsa-miR-3936    | 0.0310211 | 0.0277778                      | NA                            | -0.286016                   | 0.5977814            |
| hsa-miR-3938    | 0.0435124 | 0.0555556                      | NA                            | -0.053427                   | 0.5781998            |
| hsa-miR-3939    | 0.0974993 | 0.1111111                      | NA                            | 0.4099068                   | 0.4336707            |
| hsa-miR-3940-3p | 0.0295744 | 0.0440267                      | NA                            | -0.379636                   | 0.156931             |
| hsa-miR-3941    | 0.0245949 | 0.0555556                      | NA                            | -0.12537                    | 0.5091529            |
| hsa-miR-3942-3p | 0.0115741 | 0.0277778                      | NA                            | -0.386797                   | 0.7252209            |
| hsa-miR-3942-5p | -0.082919 | -0.159858                      | -0.152019                     | -3.214769                   | 0.4480711            |
| hsa-miR-3943    | 0.0231481 | 0.0555556                      | NA                            | -0.124756                   | 0.1684598            |
| hsa-miR-3944-3p | 0.0283193 | 0.0623642                      | -0.517538                     | -1.216424                   | 0.1752685            |
| hsa-miR-3944-5p | -0.450866 | -0.81607                       | -0.051656                     | -0.414518                   | -0.654145            |
| hsa-miR-3945    | -0.032986 | -0.055556                      | -0.179863                     | -2.859908                   | 0.5113225            |
| hsa-miR-3960    | 0.1983097 | -0.091778                      | 0.2375173                     | -0.357694                   | 0.028711             |
| hsa-miR-3972    | -0.039931 | -0.083333                      | NA                            | -3.488777                   | 0.0295709            |
| hsa-miR-3977    | 0.0612615 | 0.0555556                      | NA                            | -0.090329                   | 0.56589              |
| hsa-miR-409-3p  | -0.285971 | -0.669122                      | -0.116568                     | -0.327496                   | -0.195223            |
| hsa-miR-409-5p  | -0.124864 | -0.055556                      | -0.581302                     | -3.95692                    | 0.5113225            |
| hsa-miR-410     | 0.0731522 | -0.2415                        | 0.1725214                     | 0.0656901                   | 0.1620881            |
| hsa-miR-411     | -0.451876 | -0.731591                      | -0.097541                     | -0.347166                   | -0.157012            |
| hsa-miR-411*    | 0.061527  | 0.0277778                      | 0.263699                      | -1.7222                     | 0.550422             |
| hsa-miR-412     | 0.063298  | 0.0555556                      | NA                            | 0.0695342                   | 0.4800366            |
| hsa-miR-421     | -0.430235 | -0.726378                      | -0.160405                     | -0.505709                   | -0.271475            |
| hsa-miR-422a    | -0.13565  | -0.265299                      | 0.0781188                     | -1.732004                   | 0.2233266            |
| hsa-miR-423-3p  | -0.312534 | -0.723863                      | -0.140146                     | -0.314153                   | -0.585386            |
| hsa-miR-423-5p  | -0.146563 | -0.539214                      | -0.029438                     | -0.118653                   | -0.037644            |
| hsa-miR-424     | -0.658787 | -1.102889                      | -0.281523                     | -0.688848                   | -0.583255            |
| hsa-miR-424*    | -0.14259  | -0.398403                      | 0.0852004                     | -0.834504                   | 0.1440005            |
| hsa-miR-425     | -0.034642 | -0.388425                      | 0.0470795                     | 0.0346684                   | 0.2541792            |
| hsa-miR-425*    | -0.380338 | -0.372685                      | -0.082751                     | -2.707179                   | -0.259781            |
| hsa-miR-4252    | 0.0383921 | 0.0277778                      | NA                            | -0.342676                   | 0.1635128            |
| hsa-miR-4253    | 0.0460674 | 0.0555556                      | NA                            | -0.03126                    | 0.1684598            |
| hsa-miR-4254    | 0.0310211 | 0.0277778                      | NA                            | -0.287335                   | 0.2711022            |
| hsa-miR-4255    | -0.043403 | -0.083333                      | NA                            | -3.531009                   | 0.4743112            |

**Table S1** (continued)

Table S1 (continued)

|              | Quantile  | Median counts<br>normalization | Total counts<br>normalization | Trimmed mean of<br>M-values | Conditional quantile |
|--------------|-----------|--------------------------------|-------------------------------|-----------------------------|----------------------|
| hsa-miR-4259 | 0.1155084 | 0.1551378                      | NA                            | 0.3669108                   | 0.4776974            |
| hsa-miR-4260 | 0.0568935 | 0.0555556                      | NA                            | -0.031922                   | 0.1912905            |
| hsa-miR-4261 | -0.043403 | -0.083333                      | NA                            | -3.506723                   | 0.3507961            |
| hsa-miR-4262 | 0.044042  | 0.0555556                      | NA                            | -0.054698                   | 0.6132001            |
| hsa-miR-4264 | 0.0266204 | 0.0555556                      | NA                            | -0.103643                   | 0.4439796            |
| hsa-miR-4266 | 0.0576415 | 0.0833333                      | NA                            | 0.170332                    | 0.1962376            |
| hsa-miR-4268 | -0.013828 | -0.039307                      | 0.3880121                     | -2.612335                   | 0.1558495            |
| hsa-miR-4271 | 0.0700836 | 0.1111111                      | NA                            | 0.3794942                   | 0.2468461            |
| hsa-miR-4272 | 0.0763188 | 0.0833333                      | NA                            | 0.2686177                   | 0.645595             |
| hsa-miR-4274 | 0.0009285 | -0.027778                      | 0.1640851                     | -2.285304                   | 0.0851265            |
| hsa-miR-4275 | -0.064182 | -0.027778                      | -0.418611                     | -3.849353                   | 0.4637301            |
| hsa-miR-4278 | 0.0167824 | 0.0277778                      | NA                            | -0.363828                   | 0.2599679            |
| hsa-miR-4281 | 0.0248843 | 0.0555556                      | NA                            | -0.120578                   | 0.1684598            |
| hsa-miR-4283 | 0.0310211 | 0.0277778                      | NA                            | -0.287335                   | 0.3617317            |
| hsa-miR-4284 | -0.128025 | -0.222222                      | 0.5012669                     | -3.994583                   | 0.004083             |
| hsa-miR-4286 | 0.3611247 | 0.1658611                      | 0.4072428                     | 0.3182243                   | 0.2879142            |
| hsa-miR-4287 | 0.0407311 | 0.0277778                      | NA                            | -0.359792                   | 0.5632945            |
| hsa-miR-4289 | -0.024306 | -0.055556                      | 0.2507198                     | -2.68004                    | 0.4799612            |
| hsa-miR-429  | -0.342026 | -0.642124                      | -0.025087                     | -0.308723                   | -0.200828            |
| hsa-miR-4290 | -0.066412 | -0.104302                      | 0.4838867                     | -3.013494                   | 0.2679246            |
| hsa-miR-4291 | -0.034722 | -0.083333                      | NA                            | -3.359804                   | 0.4866703            |
| hsa-miR-4292 | 0.0061369 | -0.027778                      | 0.3730037                     | -2.231364                   | 0.0851265            |
| hsa-miR-4294 | -0.056953 | -0.023058                      | -0.201913                     | -3.059429                   | 0.0898466            |
| hsa-miR-4295 | -0.017361 | -0.027778                      | -0.205131                     | -2.391781                   | 0.3608162            |
| hsa-miR-4298 | 0.0499661 | 0.0555556                      | NA                            | -0.068549                   | 0.1684598            |
| hsa-miR-4299 | 0.0185185 | 0.0277778                      | NA                            | -0.366171                   | 0.2599679            |
| hsa-miR-4302 | 0.0638792 | 0.0833333                      | NA                            | 0.1298383                   | 0.1962376            |
| hsa-miR-4304 | -0.039931 | -0.083333                      | NA                            | -3.488777                   | 0.0295709            |
| hsa-miR-4305 | 0.0167824 | 0.0277778                      | NA                            | -0.363828                   | 0.485412             |
| hsa-miR-4307 | 0.0590504 | 0.0555556                      | NA                            | 0.0461516                   | 0.6696859            |
| hsa-miR-4308 | 0.0114401 | -0.094862                      | 1.041991                      | -2.781088                   | 0.3949074            |
| hsa-miR-4309 | 0.0104167 | 0.0277778                      | NA                            | -0.385619                   | 0.5977814            |
| hsa-miR-431  | 0.1277355 | 0.0765247                      | 0.7099058                     | -1.19824                    | 0.4780621            |
| hsa-miR-431* | -0.032986 | -0.083333                      | NA                            | -3.344104                   | 0.2392263            |
| hsa-miR-4312 | 0.0115741 | 0.0277778                      | NA                            | -0.386797                   | 0.1635128            |
| hsa-miR-4313 | -0.01645  | 0                              | -0.149877                     | -2.116924                   | 0.1129043            |
| hsa-miR-4315 | 0.044042  | 0.0718045                      | NA                            | -0.126151                   | 0.3039946            |
| hsa-miR-4317 | -0.01794  | -0.055556                      | 0.6077323                     | -2.643099                   | 0.502089             |
| hsa-miR-4319 | 0.0300926 | 0.0555556                      | NA                            | -0.10291                    | 0.3895095            |
| hsa-miR-432  | -0.166216 | -0.436615                      | 0.1635572                     | -0.656919                   | 0.1075608            |

Table S1 (continued)

**Table S1** (continued)

|                  | Quantile  | Median counts<br>normalization | Total counts<br>normalization | Trimmed mean of<br>M-values | Conditional quantile |
|------------------|-----------|--------------------------------|-------------------------------|-----------------------------|----------------------|
| hsa-miR-432*     | -0.025991 | 0                              | -0.15875                      | -2.926529                   | 0.4015375            |
| hsa-miR-4321     | 0.0310211 | 0.0277778                      | NA                            | -0.286016                   | 0.140682             |
| hsa-miR-4322     | -0.071345 | -0.083333                      | NA                            | -3.628066                   | 0.0295709            |
| hsa-miR-4323     | -0.032986 | -0.083333                      | NA                            | -3.344104                   | 0.0295709            |
| hsa-miR-4324     | -0.010995 | -0.027778                      | 0.1358342                     | -2.339214                   | 0.5422258            |
| hsa-miR-4325     | 0.0107161 | 0.0047201                      | 0.5001312                     | -2.179503                   | 0.4944897            |
| hsa-miR-4326     | 0.0534827 | -0.011529                      | 0.4883533                     | -1.727517                   | 0.4636418            |
| hsa-miR-4328     | 0.0817414 | 0.0833333                      | NA                            | 0.1501497                   | 0.6409779            |
| hsa-miR-4329     | 0.0130208 | 0.0277778                      | NA                            | -0.386383                   | 0.4000048            |
| hsa-miR-433      | 0.0165611 | -0.039307                      | 0.2025109                     | -1.352389                   | 0.4493186            |
| hsa-miR-4420     | 0.0240162 | 0.0555556                      | NA                            | -0.126783                   | 0.6255592            |
| hsa-miR-4421     | 0.0500692 | 0.0555556                      | NA                            | -0.075185                   | 0.6255592            |
| hsa-miR-4422     | -0.146228 | -0.166667                      | NA                            | -5.70782                    | 0.266448             |
| hsa-miR-4423-3p  | -0.048306 | -0.027778                      | -0.209202                     | -3.170342                   | 0.3758107            |
| hsa-miR-4423-5p  | 0.0344934 | 0.0277778                      | NA                            | -0.318088                   | 0.550422             |
| hsa-miR-4424     | 0.0162655 | 0.016249                       | 0.0477663                     | -2.729416                   | 0.6241781            |
| hsa-miR-4425     | 0.0115741 | 0.0277778                      | NA                            | -0.386797                   | 0.5977814            |
| hsa-miR-4426     | 0.0832629 | 0.0718045                      | NA                            | -0.073766                   | 0.4602286            |
| hsa-miR-4427     | -0.001178 | -0.027778                      | 0.6404182                     | -2.451341                   | 0.3758107            |
| hsa-miR-4428     | 0.0298524 | 0.0555556                      | NA                            | -0.100872                   | 0.3781152            |
| hsa-miR-4430     | -0.020255 | -0.055556                      | 0.1954698                     | -2.678189                   | 0.0573487            |
| hsa-miR-4431     | 0.0115741 | 0.0277778                      | NA                            | -0.387198                   | 0.550422             |
| hsa-miR-4432     | 0.0315998 | 0.0277778                      | NA                            | -0.323107                   | 0.5364398            |
| hsa-miR-4433     | -0.039931 | -0.083333                      | NA                            | -3.488777                   | 0.1118227            |
| hsa-miR-4434     | 0.0150463 | 0.0277778                      | NA                            | -0.366916                   | 0.5900394            |
| hsa-miR-4435     | 0.0684434 | -0.011529                      | 0.2668358                     | -1.411389                   | 0.3110308            |
| hsa-miR-4436a    | 0.0344934 | 0.0277778                      | NA                            | -0.318088                   | 0.4293152            |
| hsa-miR-4436b-3p | 0.0150463 | 0.0277778                      | NA                            | -0.366916                   | 0.5164029            |
| hsa-miR-4436b-5p | 0.0490593 | 0.0555556                      | NA                            | 0.0151125                   | 0.1684598            |
| hsa-miR-4437     | -0.006366 | 0                              | -0.328536                     | -2.053714                   | 0.5403887            |
| hsa-miR-4438     | -0.023148 | -0.055556                      | 0.0789442                     | -2.681334                   | 0.3775591            |
| hsa-miR-4440     | -0.044112 | -0.138889                      | 0.7931187                     | -3.575897                   | -0.025985            |
| hsa-miR-4443     | -0.020679 | -0.023058                      | 0.1757935                     | -2.155591                   | 0.5060154            |
| hsa-miR-4444     | 0.0130208 | 0.0277778                      | NA                            | -0.386383                   | 0.2599679            |
| hsa-miR-4445     | 0.0298637 | 0.0277778                      | NA                            | -0.286232                   | 0.4122629            |
| hsa-miR-4445*    | -0.113241 | -0.083333                      | NA                            | -5.324624                   | 0.3497813            |
| hsa-miR-4446-5p  | -0.034722 | -0.083333                      | NA                            | -3.359804                   | 0.4052918            |
| hsa-miR-4447     | 0.0089024 | -0.027778                      | 0.5664498                     | -2.344074                   | 0.3061761            |
| hsa-miR-4448     | -0.397088 | -0.716759                      | -0.072575                     | -0.475198                   | -0.523331            |
| hsa-miR-4449     | 0.0590504 | 0.0555556                      | NA                            | 0.0284766                   | 0.1684598            |

**Table S1** (continued)

Table S1 (continued)

|                 | Quantile  | Median counts<br>normalization | Total counts<br>normalization | Trimmed mean of<br>M-values | Conditional quantile |
|-----------------|-----------|--------------------------------|-------------------------------|-----------------------------|----------------------|
| hsa-miR-4450    | -0.072917 | -0.166667                      | NA                            | -4.230455                   | 0.4033369            |
| hsa-miR-4451    | 0.0365623 | 0.0555556                      | 0.0005537                     | -1.427164                   | 0.5846286            |
| hsa-miR-4453    | -0.071345 | -0.083333                      | NA                            | -3.628066                   | 0.3918373            |
| hsa-miR-4454    | 0.5299787 | 0.3657071                      | 0.6072522                     | 0.3116171                   | 0.4903995            |
| hsa-miR-4455    | 0.0204805 | 0.0718045                      | -0.222079                     | -2.453953                   | 0.4602286            |
| hsa-miR-4456    | 0.0319384 | 0.0277778                      | NA                            | -0.325031                   | 0.5568509            |
| hsa-miR-4457    | 0.0319384 | 0.0277778                      | NA                            | -0.325031                   | 0.550422             |
| hsa-miR-4458    | -0.034722 | -0.083333                      | NA                            | -3.359804                   | 0.4785903            |
| hsa-miR-4459    | 0.1854844 | 0.143609                       | 0.351906                      | -0.906231                   | 0.2567121            |
| hsa-miR-4460    | -0.023148 | -0.055556                      | 0.2265132                     | -2.679985                   | 0.5523736            |
| hsa-miR-4461    | -0.135292 | -0.236383                      | 0.1107995                     | -2.496846                   | 0.3077933            |
| hsa-miR-4462    | 0.0298637 | 0.0277778                      | NA                            | -0.286232                   | 0.2711022            |
| hsa-miR-4463    | -0.056512 | -0.055556                      | -0.458269                     | -2.923885                   | 0.0573487            |
| hsa-miR-4465    | -0.043894 | -0.055556                      | 0.3630179                     | -2.89747                    | 0.4330696            |
| hsa-miR-4466    | 0.0775198 | 0.0833333                      | NA                            | 0.227464                    | 0.1962376            |
| hsa-miR-4467    | 0.0104167 | 0.0277778                      | NA                            | -0.385619                   | 0.3503374            |
| hsa-miR-4469    | -0.217063 | -0.421885                      | 0.1702581                     | -1.101464                   | -0.30898             |
| hsa-miR-4470    | 0.0684789 | 0.0555556                      | NA                            | 0.0325967                   | 0.457093             |
| hsa-miR-4471    | 0.0319384 | 0.0277778                      | NA                            | -0.325031                   | 0.4813751            |
| hsa-miR-4472    | -0.406228 | -0.506401                      | -0.10198                      | -2.225682                   | -0.048767            |
| hsa-miR-4474-3p | -0.053039 | -0.055556                      | -0.040504                     | -2.902302                   | 0.514448             |
| hsa-miR-4474-5p | 0.0437639 | 0                              | 0.5008936                     | -1.860726                   | 0.4035885            |
| hsa-miR-4475    | -0.043403 | -0.083333                      | NA                            | -3.506723                   | 0.3011518            |
| hsa-miR-4476    | 0.0736306 | 0.0555556                      | NA                            | 0.024092                    | 0.5441807            |
| hsa-miR-4477a   | 0.0274506 | 0.0277778                      | NA                            | -0.32362                    | 0.6357069            |
| hsa-miR-4477b   | 0.0315998 | 0.0277778                      | NA                            | -0.323107                   | 0.7252209            |
| hsa-miR-4478    | -0.18963  | -0.25                          | NA                            | -5.847233                   | -0.137096            |
| hsa-miR-4479    | -0.080965 | -0.055556                      | -0.386715                     | -4.37487                    | 0.0573487            |
| hsa-miR-448     | -0.067578 | -0.083333                      | NA                            | -3.594299                   | 0.3011518            |
| hsa-miR-4480    | 0.0115741 | 0.0277778                      | NA                            | -0.38794                    | 0.4313663            |
| hsa-miR-4481    | 0.0315998 | 0.0277778                      | NA                            | -0.305393                   | 0.140682             |
| hsa-miR-4482    | 0.0115741 | 0.0277778                      | NA                            | -0.386797                   | 0.5977814            |
| hsa-miR-4483    | 0.0424969 | 0.0555556                      | NA                            | -0.031032                   | 0.3895095            |
| hsa-miR-4484    | 0.0616773 | 0.0833333                      | NA                            | 0.130456                    | 0.3660694            |
| hsa-miR-4485    | 0.0326939 | -0.078613                      | 0.3255464                     | -1.169353                   | 0.2083693            |
| hsa-miR-4486    | -0.116095 | -0.083333                      | NA                            | -5.331477                   | 0.0295709            |
| hsa-miR-4487    | 0.0460674 | 0.0555556                      | NA                            | -0.022767                   | 0.1912905            |
| hsa-miR-4488    | -0.084038 | -0.12264                       | 0.1008189                     | -3.614176                   | -0.009736            |
| hsa-miR-4489    | 0.0310211 | 0.0277778                      | NA                            | -0.286016                   | 0.2229339            |
| hsa-miR-4491    | -0.027364 | -0.048747                      | 0.0166327                     | -2.146855                   | 0.4738974            |

Table S1 (continued)

**Table S1** (continued)

|                  | Quantile  | Median counts<br>normalization | Total counts<br>normalization | Trimmed mean of<br>M-values | Conditional quantile |
|------------------|-----------|--------------------------------|-------------------------------|-----------------------------|----------------------|
| hsa-miR-4492     | 0.0607752 | 0.0833333                      | NA                            | 0.1436824                   | 0.1962376            |
| hsa-miR-4494     | -0.025463 | -0.055556                      | -0.078752                     | -2.811537                   | 0.0573487            |
| hsa-miR-4495     | -0.023148 | -0.055556                      | 0.2956404                     | -2.792536                   | 0.5067061            |
| hsa-miR-4496     | -0.032986 | -0.055556                      | -0.179863                     | -2.859908                   | 0.4330696            |
| hsa-miR-4497     | 0.0454774 | 0.0833333                      | NA                            | 0.1122373                   | 0.1962376            |
| hsa-miR-4498     | 0.0362295 | 0.0440267                      | 0.3096749                     | -1.46759                    | 0.156931             |
| hsa-miR-449a     | 0.0349198 | 0.0277778                      | 0.1454832                     | -1.686871                   | 0.550422             |
| hsa-miR-449b     | 0.0104167 | 0.0277778                      | NA                            | -0.385619                   | 0.5977814            |
| hsa-miR-449b*    | -0.0872   | -0.027778                      | -1.095068                     | -3.949785                   | 0.2947818            |
| hsa-miR-449c     | -0.117941 | -0.222222                      | 0.2799937                     | -3.18797                    | 0.3249659            |
| hsa-miR-4500     | -0.039931 | -0.083333                      | NA                            | -3.488777                   | 0.4081746            |
| hsa-miR-4502     | 0.0104167 | 0.0277778                      | NA                            | -0.385619                   | 0.5977814            |
| hsa-miR-4504     | -0.15673  | -0.138889                      | 0.0518323                     | -5.210797                   | 0.3147084            |
| hsa-miR-4506     | 0.0319384 | 0.0277778                      | NA                            | -0.325031                   | 0.5977814            |
| hsa-miR-4507     | 0.0234375 | 0.0555556                      | NA                            | -0.123039                   | 0.1684598            |
| hsa-miR-4508     | -0.039407 | -0.039307                      | 0.0581865                     | -2.739939                   | 0.0735977            |
| hsa-miR-4509     | -0.038222 | -0.055556                      | 0.2389003                     | -2.822814                   | 0.6418876            |
| hsa-miR-450a     | -0.178292 | -0.517225                      | 0.0109862                     | -0.367023                   | 0.1001411            |
| hsa-miR-450b-5p  | -0.522318 | -0.848669                      | -0.193395                     | -0.645156                   | -0.144101            |
| hsa-miR-451      | 0.5868775 | 0.0734659                      | 0.3319998                     | 0.5072019                   | 0.4804585            |
| hsa-miR-4510     | 0.0182254 | 0.0110762                      | 0.2275829                     | -1.307784                   | 0.5337205            |
| hsa-miR-4511     | 0.074195  | 0.0833333                      | NA                            | 0.3056362                   | 0.6059776            |
| hsa-miR-4512     | -0.020495 | -0.055556                      | 0.3203645                     | -2.792767                   | 0.0573487            |
| hsa-miR-4515     | 0.0274506 | 0.0277778                      | NA                            | -0.32362                    | 0.140682             |
| hsa-miR-4516     | -0.090054 | -0.027778                      | -1.089538                     | -3.954389                   | 0.0851265            |
| hsa-miR-4517     | -0.064367 | -0.178195                      | 0.3005067                     | -3.332027                   | 0.2879307            |
| hsa-miR-4518     | 0.0067651 | -0.027778                      | 0.2900251                     | -2.278006                   | 0.5422258            |
| hsa-miR-451b     | 0.1786183 | 0.1551378                      | NA                            | 0.930609                    | 0.6087352            |
| hsa-miR-452      | 0.0636459 | -0.117699                      | -0.0447                       | -0.208554                   | 0.2667862            |
| hsa-miR-452*     | 0.0104167 | 0.0277778                      | NA                            | -0.385619                   | 0.4122629            |
| hsa-miR-4520a-3p | 0.0144676 | 0.0277778                      | NA                            | -0.383929                   | 0.550422             |
| hsa-miR-4520a-5p | 0.0150463 | 0.0277778                      | NA                            | -0.366916                   | 0.5977814            |
| hsa-miR-4521     | 0.1732645 | 0.159858                       | 0.4642998                     | -1.088099                   | 0.6484831            |
| hsa-miR-4522     | 0.0814137 | 0.0833333                      | NA                            | 0.2539003                   | 0.2784894            |
| hsa-miR-4523     | 0.0198952 | -0.027778                      | 0.4886345                     | -2.148108                   | 0.0851265            |
| hsa-miR-4524     | 0.1050534 | -0.086049                      | 0.1602281                     | 0.190366                    | 0.4516113            |
| hsa-miR-4524*    | -0.074333 | -0.262903                      | 0.1984862                     | -1.526457                   | 0.2566181            |
| hsa-miR-4525     | 0.1088211 | -0.023555                      | 0.7893166                     | -1.694814                   | 0.1716006            |
| hsa-miR-4527     | 0.0144676 | 0.0277778                      | NA                            | -0.383929                   | 0.550422             |
| hsa-miR-4528     | -0.043403 | -0.083333                      | NA                            | -3.506723                   | 0.5245958            |

**Table S1** (continued)

Table S1 (continued)

|                 | Quantile  | Median counts<br>normalization | Total counts<br>normalization | Trimmed mean of<br>M-values | Conditional quantile |
|-----------------|-----------|--------------------------------|-------------------------------|-----------------------------|----------------------|
| hsa-miR-4529-3p | 0.0411136 | 0.0277778                      | NA                            | -0.359298                   | 0.4293152            |
| hsa-miR-4529-5p | 0.0322769 | 0.0277778                      | NA                            | -0.319572                   | 0.5977814            |
| hsa-miR-4531    | 0.0827886 | 0.0718045                      | 0.237855                      | -1.190757                   | 0.629449             |
| hsa-miR-4532    | -0.016487 | -0.104302                      | 0.3449649                     | -2.403745                   | 0.0086018            |
| hsa-miR-4534    | 0.0344934 | 0.0277778                      | NA                            | -0.318088                   | 0.140682             |
| hsa-miR-4535    | -0.043403 | -0.083333                      | NA                            | -3.506723                   | 0.0295709            |
| hsa-miR-4536    | 0.0054059 | -0.055556                      | 1.1785162                     | -2.61963                    | 0.3480329            |
| hsa-miR-4537    | -0.028356 | -0.055556                      | -0.082242                     | -2.815926                   | 0.267004             |
| hsa-miR-4538    | 0.0511477 | 0.0555556                      | NA                            | -0.084917                   | 0.3781152            |
| hsa-miR-4539    | 0.111026  | 0.1388889                      | NA                            | 0.5825485                   | 0.2517932            |
| hsa-miR-454     | 0.1511154 | -0.194649                      | 0.1599103                     | 0.2404923                   | 0.3026872            |
| hsa-miR-454*    | -0.095785 | -0.166667                      | 0.3107382                     | -2.779801                   | 0.2178185            |
| hsa-miR-4540    | 0.0310211 | 0.0440267                      | NA                            | -0.383091                   | 0.4771414            |
| hsa-miR-455-3p  | 0.3312001 | -0.043172                      | 0.2327884                     | 0.3933114                   | 0.5489562            |
| hsa-miR-455-5p  | 0.0576105 | -0.41982                       | 0.0454911                     | 0.009707                    | 0.1373673            |
| hsa-miR-4632    | -0.076389 | -0.166667                      | NA                            | -4.244403                   | -0.053762            |
| hsa-miR-4633-5p | 0.0115741 | 0.0277778                      | NA                            | -0.386914                   | 0.5029484            |
| hsa-miR-4634    | -0.059682 | -0.299378                      | 0.1762643                     | -1.005283                   | -0.174272            |
| hsa-miR-4635    | -0.14507  | -0.138889                      | -0.660648                     | -5.205678                   | 0.4259472            |
| hsa-miR-4636    | 0.0592414 | 0.0718045                      | 0.3292885                     | -1.277901                   | 0.4562897            |
| hsa-miR-4638-3p | -0.078748 | -0.067084                      | -0.090732                     | -2.931304                   | 0.0458199            |
| hsa-miR-4638-5p | 0.0104167 | 0.0277778                      | NA                            | -0.385619                   | 0.2229339            |
| hsa-miR-4639-3p | -0.043403 | -0.083333                      | NA                            | -3.531009                   | 0.4866703            |
| hsa-miR-4640-3p | 0.0167824 | 0.0277778                      | NA                            | -0.363828                   | 0.140682             |
| hsa-miR-4640-5p | 0.0482407 | 0.0440267                      | NA                            | -0.287719                   | 0.156931             |
| hsa-miR-4641    | -0.034722 | -0.083333                      | NA                            | -3.359804                   | 0.4866703            |
| hsa-miR-4642    | 0.0435124 | 0.0555556                      | NA                            | -0.053006                   | 0.1684598            |
| hsa-miR-4643    | -0.031829 | -0.055556                      | -0.32441                      | -2.850786                   | 0.3980418            |
| hsa-miR-4644    | -0.083378 | -0.055556                      | -0.370555                     | -4.394419                   | 0.3993475            |
| hsa-miR-4645-3p | 0.0915145 | 0.0995823                      | 0.2111451                     | -1.061598                   | 0.6222266            |
| hsa-miR-4645-5p | 0.0115741 | 0.0277778                      | NA                            | -0.386914                   | 0.4657355            |
| hsa-miR-4646-3p | 0.0322769 | 0.0277778                      | NA                            | -0.278608                   | 0.4293152            |
| hsa-miR-4646-5p | 0.0505597 | -0.017387                      | 0.1755793                     | -1.76262                    | 0.3015767            |
| hsa-miR-4647    | -0.043403 | -0.083333                      | NA                            | -3.506723                   | 0.4608426            |
| hsa-miR-4649-3p | -0.116095 | -0.083333                      | NA                            | -5.331477                   | 0.0295709            |
| hsa-miR-4649-5p | -0.108524 | -0.166667                      | NA                            | -4.440626                   | -0.053762            |
| hsa-miR-4650-5p | 0.0245949 | 0.0555556                      | NA                            | -0.124624                   | 0.6174792            |
| hsa-miR-4651    | -0.032986 | -0.083333                      | NA                            | -3.344104                   | 0.0295709            |
| hsa-miR-4652-3p | -0.093853 | -0.083333                      | 0.0801329                     | -4.202335                   | 0.4866703            |
| hsa-miR-4653-3p | 0.062621  | 0.0555556                      | NA                            | 0.0660074                   | 0.6224336            |

Table S1 (continued)



**Table S1** (continued)

|                  | Quantile  | Median counts<br>normalization | Total counts<br>normalization | Trimmed mean of<br>M-values | Conditional quantile |
|------------------|-----------|--------------------------------|-------------------------------|-----------------------------|----------------------|
| hsa-miR-4653-5p  | -0.1282   | -0.222222                      | 0.2797584                     | -4.123969                   | 0.3477814            |
| hsa-miR-4654     | 0.0115741 | 0.0277778                      | NA                            | -0.386914                   | 0.3503374            |
| hsa-miR-4655-3p  | 0.0260417 | 0.0555556                      | NA                            | -0.121878                   | 0.1684598            |
| hsa-miR-4655-5p  | 0.0115741 | 0.0277778                      | NA                            | -0.38794                    | 0.140682             |
| hsa-miR-4656     | -0.058903 | -0.055556                      | -0.658878                     | -2.964926                   | 0.0573487            |
| hsa-miR-4657     | 0.0185185 | 0.0277778                      | NA                            | -0.366171                   | 0.5946559            |
| hsa-miR-4658     | -0.011464 | -0.055556                      | 0.6211488                     | -2.788408                   | 0.4886204            |
| hsa-miR-4659a-5p | 0.0483709 | 0.0833333                      | NA                            | 0.1286423                   | 0.4678185            |
| hsa-miR-4659b-3p | 0.0513741 | 0.0555556                      | NA                            | -0.029433                   | 0.4400407            |
| hsa-miR-4659b-5p | 0.0322769 | 0.0277778                      | NA                            | -0.266595                   | 0.4657355            |
| hsa-miR-466      | -0.031829 | -0.055556                      | -0.264856                     | -2.861328                   | 0.3297738            |
| hsa-miR-4660     | -0.031829 | -0.055556                      | -0.394505                     | -2.851226                   | 0.4886204            |
| hsa-miR-4661-3p  | -0.043403 | -0.083333                      | NA                            | -3.531009                   | 0.4052918            |
| hsa-miR-4661-5p  | 0.0661424 | 0.0833333                      | 0.0408787                     | -1.124633                   | 0.6533369            |
| hsa-miR-4662a-3p | 0.0315394 | 0.0555556                      | NA                            | -0.103727                   | 0.7529987            |
| hsa-miR-4662a-5p | -0.355722 | -0.517387                      | 0.1074692                     | -1.093599                   | -0.06379             |
| hsa-miR-4662b    | 0.0845121 | 0.0995823                      | 0.1478678                     | -1.140356                   | 0.7075114            |
| hsa-miR-4663     | 0.0411136 | 0.0277778                      | NA                            | -0.358876                   | 0.382197             |
| hsa-miR-4664-3p  | 0.0150463 | 0.0277778                      | NA                            | -0.366916                   | 0.140682             |
| hsa-miR-4664-5p  | 0.0104167 | 0.0277778                      | NA                            | -0.385619                   | 0.140682             |
| hsa-miR-4665-3p  | -0.281437 | -0.380444                      | -0.061776                     | -2.192534                   | -0.26754             |
| hsa-miR-4665-5p  | -0.028356 | -0.055556                      | -0.299906                     | -2.817713                   | 0.0573487            |
| hsa-miR-4666-3p  | 0.0784597 | 0.1111111                      | NA                            | 0.3311827                   | 0.7870051            |
| hsa-miR-4667-3p  | -0.116095 | -0.083333                      | NA                            | -5.331477                   | 0.1118227            |
| hsa-miR-4667-5p  | -0.187911 | -0.194444                      | -0.600189                     | -4.824511                   | 0.1281152            |
| hsa-miR-4668-3p  | 0.0435124 | 0.0555556                      | NA                            | -0.053006                   | 0.6962369            |
| hsa-miR-4668-5p  | 0.0753341 | 0.0277778                      | 0.6010855                     | -1.453515                   | 0.6684591            |
| hsa-miR-4669     | 0.0390246 | 0.0555556                      | NA                            | -0.051783                   | 0.1684598            |
| hsa-miR-4670-3p  | 0.0185185 | 0.0277778                      | NA                            | -0.366171                   | 0.4122629            |
| hsa-miR-4670-5p  | -0.054126 | -0.055556                      | -0.363846                     | -2.940601                   | 0.3289296            |
| hsa-miR-4671-3p  | 0.0283565 | 0.0555556                      | NA                            | -0.100608                   | 0.4591441            |
| hsa-miR-4671-5p  | -0.071345 | -0.083333                      | NA                            | -3.628066                   | 0.4866703            |
| hsa-miR-4672     | -0.103653 | -0.055556                      | -1.234792                     | -4.506484                   | 0.4848332            |
| hsa-miR-4673     | 0.0130208 | 0.0277778                      | NA                            | -0.386383                   | 0.140682             |
| hsa-miR-4674     | 0.0411136 | 0.0277778                      | NA                            | -0.359298                   | 0.140682             |
| hsa-miR-4676-3p  | 0.0089024 | -0.027778                      | 0.4864659                     | -2.358133                   | 0.5422258            |
| hsa-miR-4676-5p  | 0.1219447 | 0.1273601                      | NA                            | 0.4412563                   | 0.5288975            |
| hsa-miR-4677-3p  | -0.295758 | -0.44072                       | 0.0229842                     | -1.349873                   | -0.056235            |
| hsa-miR-4677-5p  | -0.037714 | -0.055556                      | 0.2168515                     | -2.825622                   | 0.3289296            |
| hsa-miR-4679     | 0.0409045 | 0                              | 0.484018                      | -1.887063                   | 0.4535973            |

**Table S1** (continued)

Table S1 (continued)

|                 | Quantile  | Median counts<br>normalization | Total counts<br>normalization | Trimmed mean of<br>M-values | Conditional quantile |
|-----------------|-----------|--------------------------------|-------------------------------|-----------------------------|----------------------|
| hsa-miR-4680-3p | -0.239887 | -0.243191                      | -0.140372                     | -4.930906                   | 0.4327027            |
| hsa-miR-4680-5p | -0.123067 | -0.461295                      | -0.40849                      | -0.736108                   | -0.071896            |
| hsa-miR-4681    | -0.149081 | -0.166667                      | NA                            | -5.712373                   | 0.4033369            |
| hsa-miR-4682    | -0.072053 | -0.027778                      | -0.692765                     | -3.851027                   | 0.3967033            |
| hsa-miR-4683    | 0.0026042 | 0                              | 0.1183375                     | -1.850011                   | 0.2433244            |
| hsa-miR-4684-3p | 0.0614636 | 0.0555556                      | NA                            | 0.0834675                   | 0.5441807            |
| hsa-miR-4685-3p | -0.070313 | -0.138889                      | -0.260958                     | -3.771813                   | -0.025985            |
| hsa-miR-4685-5p | 0.0124421 | 0.0277778                      | NA                            | -0.390153                   | 0.140682             |
| hsa-miR-4686    | -0.512813 | -0.584517                      | -0.176604                     | -2.545577                   | -0.017639            |
| hsa-miR-4687-3p | -0.073246 | -0.076525                      | -0.391208                     | -2.602086                   | 0.0363796            |
| hsa-miR-4687-5p | -0.027569 | -0.067084                      | 0.3489854                     | -3.096615                   | 0.0458199            |
| hsa-miR-4688    | 0.0130208 | 0.0277778                      | NA                            | -0.386383                   | 0.140682             |
| hsa-miR-4689    | 0.0240162 | 0.0555556                      | NA                            | -0.128016                   | 0.1684598            |
| hsa-miR-4690-3p | 0.0397273 | -0.027778                      | 1.3198033                     | -2.065349                   | 0.0851265            |
| hsa-miR-4692    | 0.0706245 | 0.0833333                      | NA                            | 0.2529339                   | 0.6533369            |
| hsa-miR-4693-3p | 0.0260417 | 0.0555556                      | NA                            | -0.120527                   | 0.56589              |
| hsa-miR-4693-5p | 0.0310211 | 0.0277778                      | NA                            | -0.314959                   | 0.5381122            |
| hsa-miR-4694-3p | -0.043403 | -0.083333                      | NA                            | -3.531009                   | 0.3497813            |
| hsa-miR-4694-5p | 0.0638767 | 0.0555556                      | NA                            | 0.0734056                   | 0.4400407            |
| hsa-miR-4695-3p | -0.043562 | -0.027778                      | -0.652337                     | -2.479704                   | 0.2947818            |
| hsa-miR-4695-5p | 0.0886626 | 0.1111111                      | NA                            | 0.4448321                   | 0.2240154            |
| hsa-miR-4697-3p | 0.0115741 | 0.0277778                      | NA                            | -0.386914                   | 0.382197             |
| hsa-miR-4697-5p | -0.139431 | -0.166667                      | NA                            | -4.531253                   | -0.053762            |
| hsa-miR-4699-3p | 0.0332489 | 0.0277778                      | 0.2195666                     | -1.565731                   | 0.4813751            |
| hsa-miR-4700-3p | 0.1653979 | 0.2154135                      | NA                            | 0.7671475                   | 0.4277397            |
| hsa-miR-4700-5p | 0.0315998 | 0.0277778                      | NA                            | -0.323107                   | 0.5164029            |
| hsa-miR-4701-5p | -0.04865  | -0.055556                      | 0.0051244                     | -2.899261                   | 0.267004             |
| hsa-miR-4703-3p | -0.101072 | -0.138889                      | -0.279808                     | -3.853139                   | 0.3147084            |
| hsa-miR-4705    | -0.164009 | -0.159858                      | -0.79504                      | -3.574582                   | 0.2937393            |
| hsa-miR-4707-3p | -0.024609 | -0.020969                      | -0.093005                     | -1.981027                   | 0.0919352            |
| hsa-miR-4707-5p | 0.0849502 | 0.1273601                      | NA                            | 0.3692811                   | 0.2402643            |
| hsa-miR-4709-3p | 0.0488087 | 0.0555556                      | NA                            | -0.068602                   | 0.5997315            |
| hsa-miR-4709-5p | 0.079305  | 0.1273601                      | NA                            | 0.3684751                   | 0.6500043            |
| hsa-miR-4711-3p | 0.0194357 | 0.0277778                      | NA                            | -0.364046                   | 0.5977814            |
| hsa-miR-4711-5p | -0.043403 | -0.083333                      | NA                            | -3.506723                   | 0.4608426            |
| hsa-miR-4712-3p | 0.0269097 | 0.0555556                      | NA                            | -0.122759                   | 0.4591441            |
| hsa-miR-4712-5p | -0.043403 | -0.083333                      | NA                            | -3.531009                   | 0.4393109            |
| hsa-miR-4713-5p | 0.0167824 | 0.0277778                      | NA                            | -0.363828                   | 0.3503374            |
| hsa-miR-4714-5p | 0.0780985 | 0.0833333                      | NA                            | 0.2316138                   | 0.6059776            |
| hsa-miR-4715-3p | 0.1425047 | 0.1991646                      | NA                            | 0.7639835                   | 0.7433405            |

Table S1 (continued)

Table S1 (continued)

|                 | Quantile  | Median counts<br>normalization | Total counts<br>normalization | Trimmed mean of<br>M-values | Conditional quantile |
|-----------------|-----------|--------------------------------|-------------------------------|-----------------------------|----------------------|
| hsa-miR-4716-5p | -0.002672 | -0.055556                      | 1.0672985                     | -2.807931                   | 0.514448             |
| hsa-miR-4717-3p | 0.0185185 | 0.0277778                      | NA                            | -0.366171                   | 0.2229339            |
| hsa-miR-4718    | 0.0482407 | 0.0277778                      | NA                            | -0.364627                   | 0.5926139            |
| hsa-miR-4719    | -0.015046 | -0.027778                      | -0.002791                     | -2.382313                   | 0.5801513            |
| hsa-miR-4720-5p | -0.052827 | -0.055556                      | -0.021817                     | -2.938989                   | 0.3980418            |
| hsa-miR-4721    | -0.043403 | -0.083333                      | NA                            | -3.506723                   | 0.0295709            |
| hsa-miR-4722-3p | 0.0310211 | 0.0277778                      | NA                            | -0.314959                   | 0.140682             |
| hsa-miR-4722-5p | -0.071351 | -0.13208                       | -0.156976                     | -2.869031                   | -0.019176            |
| hsa-miR-4724-3p | 0.0240162 | 0.0555556                      | NA                            | -0.126783                   | 0.6203917            |
| hsa-miR-4724-5p | 0.1811591 | 0.2222222                      | NA                            | 0.9658522                   | 0.7726786            |
| hsa-miR-4725-3p | 0.0115741 | 0.0277778                      | NA                            | -0.387198                   | 0.140682             |
| hsa-miR-4725-5p | -0.044451 | -0.138889                      | 0.8034827                     | -3.589336                   | -0.025985            |
| hsa-miR-4726-3p | 0.0322769 | 0.0277778                      | NA                            | -0.319572                   | 0.140682             |
| hsa-miR-4726-5p | -0.000906 | -0.027778                      | 0.3763142                     | -2.312656                   | 0.0851265            |
| hsa-miR-4727-3p | -0.005945 | -0.055556                      | 0.6573219                     | -2.776177                   | 0.514448             |
| hsa-miR-4727-5p | 0.0104167 | 0.0277778                      | NA                            | -0.385619                   | 0.4293152            |
| hsa-miR-4728-3p | -0.002025 | -0.027778                      | 0.3560589                     | -2.183653                   | 0.0851265            |
| hsa-miR-4728-5p | 0.0115741 | 0.0277778                      | NA                            | -0.386797                   | 0.140682             |
| hsa-miR-4729    | 0.0745336 | 0.0833333                      | NA                            | 0.2593489                   | 0.5369306            |
| hsa-miR-4730    | 0.0115741 | 0.0277778                      | NA                            | -0.38794                    | 0.140682             |
| hsa-miR-4732-3p | -0.055784 | -0.138889                      | 0.3567256                     | -3.696491                   | 0.0562672            |
| hsa-miR-4733-3p | 0.0905406 | 0.1273601                      | NA                            | 0.3237734                   | 0.6159852            |
| hsa-miR-4733-5p | 0.0115741 | 0.0277778                      | NA                            | -0.387198                   | 0.5164029            |
| hsa-miR-4734    | 0.0124421 | 0.0277778                      | NA                            | -0.390153                   | 0.140682             |
| hsa-miR-4735-3p | -0.032986 | -0.083333                      | NA                            | -3.344104                   | 0.4789283            |
| hsa-miR-4735-5p | -0.056004 | -0.055556                      | -0.637195                     | -2.927004                   | 0.3289296            |
| hsa-miR-4736    | -0.159498 | -0.166667                      | NA                            | -5.907907                   | 0.2055604            |
| hsa-miR-4737    | -0.018519 | -0.055556                      | 0.254245                      | -2.65884                    | 0.4196151            |
| hsa-miR-4738-3p | -0.116046 | -0.083333                      | -0.567303                     | -4.226998                   | 0.2392263            |
| hsa-miR-4738-5p | 0.0130208 | 0.0277778                      | NA                            | -0.386383                   | 0.550422             |
| hsa-miR-4739    | 0.0480002 | 0.0718045                      | 0.062876                      | -1.41128                    | 0.1847088            |
| hsa-miR-4740-3p | -0.043403 | -0.083333                      | NA                            | -3.520975                   | 0.0295709            |
| hsa-miR-4740-5p | -0.116095 | -0.083333                      | NA                            | -5.331477                   | 0.0295709            |
| hsa-miR-4741    | -0.076695 | -0.111111                      | 0.0624108                     | -3.248081                   | 0.0017932            |
| hsa-miR-4742-3p | 0.0866328 | 0.0555556                      | NA                            | -0.031914                   | 0.6224336            |
| hsa-miR-4742-5p | -0.058177 | -0.055556                      | -0.343131                     | -2.945042                   | 0.3297738            |
| hsa-miR-4743    | -0.039931 | -0.083333                      | NA                            | -3.488777                   | 0.0295709            |
| hsa-miR-4745-3p | 0.0438509 | 0.0555556                      | NA                            | 0.0027933                   | 0.1684598            |
| hsa-miR-4745-5p | 0.060535  | 0.0833333                      | NA                            | 0.2210188                   | 0.1962376            |
| hsa-miR-4746-3p | -0.039931 | -0.083333                      | NA                            | -3.488777                   | 0.0295709            |

Table S1 (continued)

Table S1 (continued)

|                 | Quantile  | Median counts<br>normalization | Total counts<br>normalization | Trimmed mean of<br>M-values | Conditional quantile |
|-----------------|-----------|--------------------------------|-------------------------------|-----------------------------|----------------------|
| hsa-miR-4746-5p | 0.0831947 | 0.0995823                      | NA                            | 0.1920683                   | 0.2124866            |
| hsa-miR-4747-5p | 0.0124421 | 0.0277778                      | NA                            | -0.390153                   | 0.5164029            |
| hsa-miR-4748    | -0.031829 | -0.055556                      | -0.204069                     | -2.859853                   | 0.4848332            |
| hsa-miR-4749-3p | 0.0958037 | 0.1111111                      | NA                            | 0.4915607                   | 0.2240154            |
| hsa-miR-4749-5p | -0.043403 | -0.083333                      | NA                            | -3.531009                   | 0.0295709            |
| hsa-miR-4750    | -0.053819 | -0.111111                      | 0.0607168                     | -3.27773                    | 0.0017932            |
| hsa-miR-4751    | 0.0094569 | -0.027778                      | 0.3343421                     | -2.346879                   | 0.3266415            |
| hsa-miR-4753-5p | 0.0124421 | 0.0277778                      | NA                            | -0.390153                   | 0.5977814            |
| hsa-miR-4754    | -0.068086 | -0.083333                      | NA                            | -3.591571                   | 0.1599911            |
| hsa-miR-4755-3p | 0.0144676 | 0.0277778                      | NA                            | -0.381549                   | 0.5164029            |
| hsa-miR-4755-5p | -0.043403 | -0.083333                      | NA                            | -3.520975                   | 0.4866703            |
| hsa-miR-4756-5p | 0.0194357 | 0.0277778                      | NA                            | -0.364046                   | 0.140682             |
| hsa-miR-4757-3p | 0.0167824 | 0.0277778                      | NA                            | -0.363828                   | 0.3503374            |
| hsa-miR-4757-5p | 0.0144676 | 0.0277778                      | NA                            | -0.381549                   | 0.2711022            |
| hsa-miR-4758-3p | 0.0026042 | 0                              | 0.0775967                     | -1.849191                   | 0.1129043            |
| hsa-miR-4758-5p | 0.3672248 | 0.1670404                      | 0.2789799                     | -0.45453                    | 0.2802974            |
| hsa-miR-4760-3p | -0.067578 | -0.083333                      | NA                            | -3.594299                   | 0.6141098            |
| hsa-miR-4760-5p | 0.0144676 | 0.0277778                      | NA                            | -0.383929                   | 0.7252209            |
| hsa-miR-4762-3p | 0.0322769 | 0.0277778                      | NA                            | -0.278608                   | 0.4122629            |
| hsa-miR-4762-5p | -0.086806 | -0.166667                      | NA                            | -4.383236                   | 0.266448             |
| hsa-miR-4763-3p | 0.0115741 | 0.0277778                      | NA                            | -0.386914                   | 0.140682             |
| hsa-miR-4763-5p | -0.023946 | 0                              | -0.166606                     | -3.371949                   | 0.1129043            |
| hsa-miR-4764-3p | 0.0534384 | 0.0555556                      | NA                            | -0.049208                   | 0.5781998            |
| hsa-miR-4766-3p | 0.039098  | 0.0440267                      | NA                            | -0.363096                   | 0.6062884            |
| hsa-miR-4767    | -0.118972 | -0.261529                      | 0.4873626                     | -3.733576                   | -0.148625            |
| hsa-miR-4768-3p | 0.1142693 | 0.1111111                      | NA                            | 0.5057865                   | 0.6811147            |
| hsa-miR-4768-5p | -0.039931 | -0.083333                      | NA                            | -3.488777                   | 0.4393109            |
| hsa-miR-4769-5p | 0.0274506 | 0.0277778                      | NA                            | -0.32362                    | 0.5269698            |
| hsa-miR-4770    | 0.0696026 | -0.011529                      | 0.1290602                     | -1.334139                   | 0.4782407            |
| hsa-miR-4771    | 0.1219491 | 0.0833333                      | NA                            | 0.2693732                   | 0.4869218            |
| hsa-miR-4772-3p | 0.0130208 | 0.0277778                      | NA                            | -0.386383                   | 0.5977814            |
| hsa-miR-4772-5p | -0.071716 | -0.12264                       | 0.3480714                     | -3.470208                   | 0.2618452            |
| hsa-miR-4773    | 0.0414378 | 0.0555556                      | NA                            | -0.014526                   | 0.6255592            |
| hsa-miR-4774-3p | 0.0115741 | 0.0277778                      | NA                            | -0.385569                   | 0.4608924            |
| hsa-miR-4775    | 0.1110061 | 0.0602757                      | 0.1138599                     | -0.880259                   | 0.7577188            |
| hsa-miR-4776-3p | 0.0629595 | 0.0555556                      | NA                            | 0.0351982                   | 0.4800366            |
| hsa-miR-4777-3p | 0.001825  | -0.027778                      | 0.6796226                     | -2.35886                    | 0.4258195            |
| hsa-miR-4778-5p | 0.0130208 | 0.0277778                      | NA                            | -0.386383                   | 0.4813751            |
| hsa-miR-4781-3p | -0.023148 | -0.055556                      | 0.0088493                     | -2.681775                   | 0.4670887            |
| hsa-miR-4782-3p | -0.043403 | -0.083333                      | NA                            | -3.531009                   | 0.5245958            |

Table S1 (continued)

**Table S1** (continued)

|                 | Quantile  | Median counts<br>normalization | Total counts<br>normalization | Trimmed mean of<br>M-values | Conditional quantile |
|-----------------|-----------|--------------------------------|-------------------------------|-----------------------------|----------------------|
| hsa-miR-4782-5p | -0.116095 | -0.083333                      | NA                            | -5.331477                   | 0.5245958            |
| hsa-miR-4783-3p | 0.0696421 | 0.0833333                      | NA                            | 0.1761045                   | 0.1962376            |
| hsa-miR-4783-5p | 0.0124421 | 0.0277778                      | NA                            | -0.390153                   | 0.140682             |
| hsa-miR-4784    | 0.0115741 | 0.0277778                      | NA                            | -0.386797                   | 0.5029484            |
| hsa-miR-4785    | 0.0874206 | -0.027778                      | 0.8675965                     | -1.81364                    | 0.0851265            |
| hsa-miR-4786-3p | -0.067578 | -0.083333                      | NA                            | -3.594299                   | 0.0295709            |
| hsa-miR-4786-5p | 0.0220021 | 0.0277778                      | -0.005186                     | -1.668748                   | 0.3503374            |
| hsa-miR-4787-3p | 0.0185185 | 0.0277778                      | NA                            | -0.366171                   | 0.140682             |
| hsa-miR-4787-5p | 0.0340301 | -0.094862                      | 0.5532208                     | -2.089086                   | 0.0180421            |
| hsa-miR-4788    | -0.068086 | -0.083333                      | NA                            | -3.591571                   | 0.2392263            |
| hsa-miR-4789-3p | -0.056473 | -0.111111                      | 0.3531887                     | -3.248991                   | 0.2924774            |
| hsa-miR-4790-5p | 0.0228588 | 0.0555556                      | NA                            | -0.126833                   | 0.5578728            |
| hsa-miR-4791    | 0.0315998 | 0.0277778                      | NA                            | -0.305393                   | 0.5900394            |
| hsa-miR-4792    | -0.311649 | -0.55888                       | -0.241871                     | -1.587209                   | -0.47006             |
| hsa-miR-4793-3p | 0.1547297 | 0.1829156                      | NA                            | 0.8556909                   | 0.6073967            |
| hsa-miR-4793-5p | 0.0468863 | 0.0555556                      | NA                            | -0.028087                   | 0.2225887            |
| hsa-miR-4796-3p | -0.029404 | -0.094862                      | 0.3029339                     | -2.958417                   | 0.289623             |
| hsa-miR-4796-5p | -0.013574 | -0.083333                      | 0.5466183                     | -2.779655                   | 0.370264             |
| hsa-miR-4797-3p | 0.0404714 | 0.0555556                      | NA                            | -0.051226                   | 0.6203917            |
| hsa-miR-4797-5p | 0.0115741 | 0.0277778                      | NA                            | -0.386914                   | 0.5926139            |
| hsa-miR-4798-3p | 0.0524219 | 0.0833333                      | NA                            | 0.1303402                   | 0.4678185            |
| hsa-miR-4798-5p | 0.0605493 | 0.0555556                      | NA                            | -0.062107                   | 0.5091529            |
| hsa-miR-4800-3p | -0.185633 | -0.333333                      | NA                            | -4.856617                   | -0.197598            |
| hsa-miR-4800-5p | 0.0144676 | 0.0277778                      | NA                            | -0.381549                   | 0.4293152            |
| hsa-miR-4801    | 0.0318779 | 0.0555556                      | NA                            | -0.105435                   | 0.4400407            |
| hsa-miR-4802-3p | 0.0763075 | 0.1111111                      | NA                            | 0.4049278                   | 0.5660141            |
| hsa-miR-4802-5p | 0.0693365 | 0.0555556                      | 0.3301979                     | -1.141665                   | 0.4400407            |
| hsa-miR-4803    | 0.0144676 | 0.0277778                      | NA                            | -0.383929                   | 0.7036718            |
| hsa-miR-4804-3p | 0.1121174 | 0.0833333                      | NA                            | 0.3094717                   | 0.6481694            |
| hsa-miR-483-3p  | -0.428781 | -0.775439                      | -0.136092                     | -0.612405                   | -0.406413            |
| hsa-miR-483-5p  | 0.237497  | -0.196277                      | 0.2010019                     | 0.1049478                   | 0.3180541            |
| hsa-miR-484     | -0.118867 | -0.5057                        | -0.021258                     | -0.097396                   | -0.295472            |
| hsa-miR-485-3p  | 0.0441247 | -0.176107                      | 0.4203006                     | -1.155332                   | 0.3134204            |
| hsa-miR-485-5p  | -0.109378 | -0.220134                      | 0.1522206                     | -2.554777                   | 0.2684915            |
| hsa-miR-486-3p  | 0.5496282 | 0.1986037                      | 0.2846182                     | 0.4149049                   | 0.4301644            |
| hsa-miR-486-5p  | 0.4103474 | -0.06194                       | 0.2458513                     | 0.3714402                   | 0.0304434            |
| hsa-miR-487a    | -0.126458 | -0.282498                      | 0.2734155                     | -2.168643                   | 0.1019872            |
| hsa-miR-487b    | 0.1402649 | -0.19936                       | 0.159647                      | 0.218952                    | 0.3232845            |
| hsa-miR-488     | 0.169578  | 0.0602757                      | 0.5495225                     | -0.8774                     | 0.4638642            |
| hsa-miR-488*    | -0.007654 | -0.055556                      | 0.5379802                     | -2.696747                   | 0.5092805            |

**Table S1** (continued)

**Table S1** (continued)

|                  | Quantile  | Median counts<br>normalization | Total counts<br>normalization | Trimmed mean of<br>M-values | Conditional quantile |
|------------------|-----------|--------------------------------|-------------------------------|-----------------------------|----------------------|
| hsa-miR-489      | -0.086316 | -0.217502                      | 0.4085636                     | -2.524403                   | 0.3525015            |
| hsa-miR-490-3p   | 0.15246   | -0.105307                      | 0.190766                      | -0.106808                   | 0.2173968            |
| hsa-miR-490-5p   | -0.062211 | -0.111111                      | -0.233161                     | -3.320963                   | 0.1716249            |
| hsa-miR-491-3p   | -0.024884 | -0.055556                      | 0.2747358                     | -2.79581                    | 0.3289296            |
| hsa-miR-491-5p   | -0.046941 | -0.150418                      | 0.5238712                     | -2.594306                   | 0.1721419            |
| hsa-miR-493      | 0.1701681 | -0.019973                      | 0.4055328                     | 0.1221143                   | 0.4686517            |
| hsa-miR-493*     | -0.268276 | -0.498099                      | 0.0538837                     | -0.764855                   | -0.044502            |
| hsa-miR-494      | 0.3763589 | 0.2987469                      | 0.2536635                     | -0.880536                   | 0.8213911            |
| hsa-miR-495      | 0.347212  | 0.2237747                      | 0.1058111                     | -0.256204                   | 0.677372             |
| hsa-miR-496      | -0.031829 | -0.055556                      | -0.172774                     | -2.8361                     | 0.3289296            |
| hsa-miR-497      | -0.021257 | -0.415722                      | 0.0631056                     | -0.009349                   | 0.1654603            |
| hsa-miR-497*     | -0.073645 | -0.155138                      | 0.2676485                     | -2.011445                   | 0.3675064            |
| hsa-miR-498      | -0.02549  | -0.027778                      | 0.0176487                     | -2.391172                   | 0.5163981            |
| hsa-miR-499-3p   | -0.071345 | -0.083333                      | NA                            | -3.628066                   | 0.4393109            |
| hsa-miR-499-5p   | -0.372477 | -0.561317                      | 0.1544204                     | -1.542083                   | 0.000945             |
| hsa-miR-499a-3p  | -0.128069 | -0.187636                      | 0.0764092                     | -3.713896                   | 0.2659615            |
| hsa-miR-499a-5p  | -0.067578 | -0.083333                      | NA                            | -3.594299                   | 0.3497813            |
| hsa-miR-500a     | 0.0073795 | -0.140525                      | 0.2287445                     | -0.820081                   | 0.4263533            |
| hsa-miR-500a*    | -0.161325 | -0.524268                      | -0.036066                     | -0.13406                    | -0.064148            |
| hsa-miR-500b     | 0.0638792 | 0.0833333                      | NA                            | 0.1313386                   | 0.6533369            |
| hsa-miR-501-3p   | 0.2668695 | -0.108837                      | 0.1725877                     | 0.5232124                   | 0.3797886            |
| hsa-miR-501-5p   | 0.0080166 | -0.023058                      | 0.1590557                     | -2.134731                   | 0.546946             |
| hsa-miR-502-3p   | -0.345038 | -0.461254                      | 0.0871194                     | -0.793006                   | 0.1087493            |
| hsa-miR-502-5p   | 0.0115741 | 0.0277778                      | NA                            | -0.38794                    | 0.5926139            |
| hsa-miR-503      | 0.108343  | -0.074843                      | 0.4871869                     | -0.686113                   | 0.3466249            |
| hsa-miR-504      | -0.121395 | -0.088053                      | -0.263234                     | -3.335228                   | 0.4005717            |
| hsa-miR-5047     | 0.0150463 | 0.0277778                      | NA                            | -0.366916                   | 0.5681665            |
| hsa-miR-505      | -0.184227 | -0.587645                      | -0.051813                     | -0.199742                   | -0.038427            |
| hsa-miR-505*     | -0.118247 | -0.171387                      | -0.09268                      | -2.134136                   | 0.3986168            |
| hsa-miR-506      | 0.0411136 | 0.0277778                      | NA                            | -0.358876                   | 0.5926139            |
| hsa-miR-507      | 0.0274506 | 0.0277778                      | NA                            | -0.32362                    | 0.4313663            |
| hsa-miR-508-3p   | 0.1298249 | 0.1551378                      | NA                            | 0.5238108                   | 0.5404672            |
| hsa-miR-508-5p   | 0.0920917 | 0.0833333                      | NA                            | 0.2155315                   | 0.5112175            |
| hsa-miR-509-3-5p | 0.0699039 | 0.0555556                      | NA                            | 0.0639863                   | 0.6255592            |
| hsa-miR-509-3p   | 0.048604  | 0.016249                       | 0.7510356                     | -1.694271                   | 0.5862526            |
| hsa-miR-509-5p   | 0.0322769 | 0.0277778                      | NA                            | -0.319572                   | 0.5926139            |
| hsa-miR-5095     | -0.032876 | -0.111111                      | 0.5114915                     | -3.094952                   | 0.084045             |
| hsa-miR-5096     | 0.1838388 | 0.1944444                      | 0.4266697                     | -0.30531                    | 0.7368484            |
| hsa-miR-510      | 0.0721347 | 0.0555556                      | NA                            | 0.0014605                   | 0.6255592            |
| hsa-miR-511      | 0.1388896 | 0.0487469                      | 0.3225793                     | -0.834566                   | 0.613583             |

**Table S1** (continued)

Table S1 (continued)

|                 | Quantile  | Median counts<br>normalization | Total counts<br>normalization | Trimmed mean of<br>M-values | Conditional quantile |
|-----------------|-----------|--------------------------------|-------------------------------|-----------------------------|----------------------|
| hsa-miR-512-3p  | 0.0150463 | 0.0277778                      | NA                            | -0.366916                   | 0.5977814            |
| hsa-miR-513a-3p | 0.0124421 | 0.0277778                      | NA                            | -0.390153                   | 0.5381122            |
| hsa-miR-513a-5p | 0.0268719 | 0.0440267                      | NA                            | -0.379674                   | 0.6140303            |
| hsa-miR-513b    | -0.071345 | -0.083333                      | NA                            | -3.628066                   | 0.370264             |
| hsa-miR-514     | -0.071345 | -0.083333                      | NA                            | -3.628066                   | 0.3202552            |
| hsa-miR-515-3p  | -0.008102 | -0.027778                      | 0.4160154                     | -2.197152                   | 0.5422258            |
| hsa-miR-516a-3p | 0.0115741 | 0.0277778                      | NA                            | -0.386914                   | 0.5977814            |
| hsa-miR-516a-5p | -0.068593 | -0.083333                      | NA                            | -3.61354                    | 0.3715697            |
| hsa-miR-516b    | 0.0315998 | 0.0277778                      | NA                            | -0.323107                   | 0.4122629            |
| hsa-miR-516b*   | 0.0704184 | 0.0555556                      | NA                            | 0.0115141                   | 0.6255592            |
| hsa-miR-517a    | -0.039931 | -0.083333                      | NA                            | -3.488777                   | 0.4393109            |
| hsa-miR-517b    | -0.032986 | -0.083333                      | NA                            | -3.344104                   | 0.4393109            |
| hsa-miR-518a-3p | 0.0124421 | 0.0277778                      | NA                            | -0.390153                   | 0.5164029            |
| hsa-miR-518c    | 0.0115741 | 0.0277778                      | NA                            | -0.385569                   | 0.4826808            |
| hsa-miR-518d-3p | 0.0004482 | -0.027778                      | 0.2107768                     | -2.331151                   | 0.3737597            |
| hsa-miR-518f*   | -0.032986 | -0.083333                      | NA                            | -3.344104                   | 0.4866703            |
| hsa-miR-519a    | 0.0510356 | 0.0555556                      | NA                            | -0.010691                   | 0.5091529            |
| hsa-miR-519b-5p | 0.0315998 | 0.0277778                      | NA                            | -0.323107                   | 0.5164029            |
| hsa-miR-519c-3p | 0.2326874 | 0.1043024                      | 1.0079149                     | -1.28423                    | 0.7101397            |
| hsa-miR-520a-3p | 0.0115741 | 0.0277778                      | NA                            | -0.38794                    | 0.550422             |
| hsa-miR-520a-5p | -0.034722 | -0.083333                      | NA                            | -3.359804                   | 0.4815028            |
| hsa-miR-520b    | 0.0167824 | 0.0277778                      | NA                            | -0.363828                   | 0.4608924            |
| hsa-miR-520c-3p | -0.043403 | -0.083333                      | NA                            | -3.520975                   | 0.3011518            |
| hsa-miR-520c-5p | 0.0185185 | 0.0277778                      | NA                            | -0.366171                   | 0.5977814            |
| hsa-miR-520d-3p | -0.059771 | -0.055556                      | -0.41077                      | -2.959885                   | 0.4670887            |
| hsa-miR-520d-5p | 0.0473232 | 0.0555556                      | NA                            | -0.027169                   | 0.6255592            |
| hsa-miR-522     | 0.0115741 | 0.0277778                      | NA                            | -0.386914                   | 0.4813751            |
| hsa-miR-522*    | -0.116095 | -0.083333                      | NA                            | -5.331477                   | 0.4052918            |
| hsa-miR-523     | 0.0104167 | 0.0277778                      | NA                            | -0.385619                   | 0.4522588            |
| hsa-miR-523*    | 0.0460674 | 0.0555556                      | NA                            | -0.022767                   | 0.5441807            |
| hsa-miR-524-3p  | 0.0150463 | 0.0277778                      | NA                            | -0.366916                   | 0.4293152            |
| hsa-miR-524-5p  | 0.0460674 | 0.0555556                      | NA                            | 0.0036082                   | 0.5781998            |
| hsa-miR-525-3p  | -0.039931 | -0.083333                      | NA                            | -3.488777                   | 0.2392263            |
| hsa-miR-526b    | -0.039931 | -0.083333                      | NA                            | -3.488777                   | 0.4835448            |
| hsa-miR-532-3p  | -0.143004 | -0.330897                      | 0.1485676                     | -0.382009                   | -0.217993            |
| hsa-miR-532-5p  | -0.013915 | -0.452953                      | 0.0267984                     | -0.039106                   | 0.0750858            |
| hsa-miR-539     | -0.069418 | -0.076525                      | -0.167854                     | -2.438458                   | 0.3079605            |
| hsa-miR-541     | -0.069729 | -0.027778                      | -0.629185                     | -3.880904                   | 0.4608474            |
| hsa-miR-541*    | 0.0144676 | 0.0277778                      | NA                            | -0.381549                   | 0.5749659            |
| hsa-miR-542-3p  | -0.183816 | -0.534343                      | -0.045226                     | -0.231198                   | 0.0802273            |

Table S1 (continued)

Table S1 (continued)

|                 | Quantile  | Median counts<br>normalization | Total counts<br>normalization | Trimmed mean of<br>M-values | Conditional quantile |
|-----------------|-----------|--------------------------------|-------------------------------|-----------------------------|----------------------|
| hsa-miR-542-5p  | 0.0657411 | -0.10008                       | 0.1522451                     | -0.5997                     | 0.4440958            |
| hsa-miR-543     | -0.048555 | -0.143609                      | 0.320613                      | -2.284821                   | 0.3790352            |
| hsa-miR-544     | 0.0595582 | 0.0277778                      | 0.416003                      | -1.529446                   | 0.6357069            |
| hsa-miR-545     | 0.0672157 | 0.0277778                      | 0.8113335                     | -1.386198                   | 0.4813751            |
| hsa-miR-545*    | -0.068036 | -0.138889                      | -0.006278                     | -3.039344                   | 0.5585542            |
| hsa-miR-548a-3p | -0.002672 | -0.055556                      | 0.9752169                     | -2.833165                   | 0.3980418            |
| hsa-miR-548a-5p | 0.0115741 | 0.0277778                      | NA                            | -0.386914                   | 0.6357069            |
| hsa-miR-548aa   | 0.1184972 | 0.0602757                      | 0.3951596                     | -1.094859                   | 0.663322             |
| hsa-miR-548ab   | 0.0491415 | 0.0718045                      | -0.086893                     | -1.28455                    | 0.7692476            |
| hsa-miR-548ac   | -0.197228 | -0.13208                       | NA                            | -5.286549                   | 0.3215171            |
| hsa-miR-548ae   | -0.022561 | -0.048747                      | 0.1068986                     | -2.20722                    | 0.6271471            |
| hsa-miR-548ag   | -0.096442 | -0.138889                      | -0.309242                     | -3.820618                   | 0.2646996            |
| hsa-miR-548ah   | 0.0125556 | -0.067582                      | 0.2641979                     | -1.68091                    | 0.434735             |
| hsa-miR-548ai   | 0.0245949 | 0.0555556                      | NA                            | -0.124339                   | 0.5091529            |
| hsa-miR-548aj   | 0.0438509 | 0.0555556                      | NA                            | -0.04651                    | 0.7529987            |
| hsa-miR-548ak   | -0.032986 | -0.083333                      | NA                            | -3.344104                   | 0.4789283            |
| hsa-miR-548al   | 0.0194977 | -0.027778                      | 0.7749356                     | -2.402778                   | 0.3567074            |
| hsa-miR-548am   | -0.217442 | -0.429831                      | -0.028501                     | -0.922607                   | 0.1780977            |
| hsa-miR-548an   | -0.012375 | -0.099582                      | 0.335876                      | -1.969678                   | 0.402735             |
| hsa-miR-548b-3p | 0.1054323 | 0.0508354                      | 0.2849752                     | -1.291054                   | 0.4353206            |
| hsa-miR-548b-5p | -0.089448 | -0.159858                      | -0.006087                     | -2.393573                   | 0.2937393            |
| hsa-miR-548c-3p | -0.034973 | -0.104302                      | 0.4056465                     | -2.658221                   | 0.5931407            |
| hsa-miR-548c-5p | 0.1637847 | 0.1388889                      | 0.0307547                     | -1.172653                   | 0.5924862            |
| hsa-miR-548d-3p | 0.0104621 | -0.027778                      | 0.6197017                     | -2.322449                   | 0.4258195            |
| hsa-miR-548d-5p | 0.2115674 | 0.0576893                      | 0.6401217                     | -0.775988                   | 0.6656184            |
| hsa-miR-548e    | -0.184996 | -0.357067                      | 0.0189835                     | -1.272956                   | 0.2508618            |
| hsa-miR-548f    | 0.0671552 | 0.0833333                      | NA                            | 0.1337136                   | 0.7807765            |
| hsa-miR-548g    | -0.191242 | -0.155636                      | -0.166308                     | -2.765477                   | 0.5418074            |
| hsa-miR-548h    | 0.0277612 | -0.055556                      | 0.2382767                     | -1.319206                   | 0.3980418            |
| hsa-miR-548i    | -0.005208 | 0                              | -0.120408                     | -2.029342                   | 0.4535973            |
| hsa-miR-548j    | 0.0122038 | -0.027778                      | 0.1665081                     | -2.007953                   | 0.4258195            |
| hsa-miR-548k    | 0.1836966 | -0.000507                      | 0.0892118                     | -0.214483                   | 0.4530903            |
| hsa-miR-548l    | 0.0918802 | 0.0277778                      | 0.8215901                     | -1.538992                   | 0.4813751            |
| hsa-miR-548m    | -0.066191 | -0.111111                      | -0.013015                     | -3.27446                    | 0.4511505            |
| hsa-miR-548n    | -0.08037  | -0.143609                      | 0.2245445                     | -2.92283                    | 0.5538341            |
| hsa-miR-548o    | -0.255177 | -0.511931                      | -0.04697                      | -0.398904                   | -0.127446            |
| hsa-miR-548p    | 0.0523051 | 0.0555556                      | NA                            | -0.086152                   | 0.6634847            |
| hsa-miR-548q    | -0.193301 | -0.318766                      | 0.0452572                     | -1.502967                   | 0.1698596            |
| hsa-miR-548s    | 0.0332546 | 0.016249                       | 0.109884                      | -1.823905                   | 0.5265834            |
| hsa-miR-548t    | -0.063483 | -0.150418                      | 0.1909745                     | -1.951826                   | 0.2531708            |

Table S1 (continued)



Table S1 (continued)

|                | Quantile  | Median counts<br>normalization | Total counts<br>normalization | Trimmed mean of<br>M-values | Conditional quantile |
|----------------|-----------|--------------------------------|-------------------------------|-----------------------------|----------------------|
| hsa-miR-548u   | -0.119968 | -0.236383                      | 0.0116027                     | -1.305061                   | 0.1489467            |
| hsa-miR-548v   | 0.0473232 | 0.0555556                      | NA                            | 0.0119441                   | 0.4400407            |
| hsa-miR-548w   | -0.185828 | -0.238471                      | -0.127739                     | -3.205785                   | 0.1468582            |
| hsa-miR-548x   | 0.0167824 | 0.0277778                      | NA                            | -0.363828                   | 0.7252209            |
| hsa-miR-548y   | 0.0477922 | 0.0833333                      | NA                            | 0.1285661                   | 0.6912624            |
| hsa-miR-548z   | 0.2923703 | 0.0896894                      | 0.2582476                     | -0.242549                   | 0.6000239            |
| hsa-miR-549    | 0.0757291 | 0.0833333                      | NA                            | 0.143979                    | 0.516448             |
| hsa-miR-550a   | 0.1649566 | 0.2106934                      | -0.00254                      | -0.39311                    | 0.4540178            |
| hsa-miR-550a*  | 0.1527999 | 0.1226399                      | 0.1872071                     | -0.610815                   | 0.6926435            |
| hsa-miR-551a   | 0.0460674 | 0.0555556                      | NA                            | 0.0036082                   | 0.457093             |
| hsa-miR-551b   | 0.2187736 | 0.2709691                      | 0.2402307                     | -0.412369                   | 0.8113578            |
| hsa-miR-551b*  | -0.043403 | -0.083333                      | NA                            | -3.520975                   | 0.4052918            |
| hsa-miR-552    | -0.118379 | -0.083333                      | -0.348071                     | -4.233134                   | 0.3497813            |
| hsa-miR-553    | 0.0404916 | -0.081245                      | 0.0366631                     | -1.228471                   | 0.5946492            |
| hsa-miR-554    | 0.0322041 | -0.027778                      | 0.9176753                     | -2.235918                   | 0.3737597            |
| hsa-miR-555    | 0.034482  | 0.0555556                      | NA                            | -0.082289                   | 0.6203917            |
| hsa-miR-556-3p | -0.20643  | -0.270969                      | -0.060447                     | -3.376634                   | 0.426474             |
| hsa-miR-556-5p | 0.0420165 | 0.0555556                      | NA                            | -0.049936                   | 0.5091529            |
| hsa-miR-557    | 0.0325171 | 0.0277778                      | NA                            | -0.291863                   | 0.2711022            |
| hsa-miR-558    | 0.0115741 | 0.0277778                      | NA                            | -0.385569                   | 0.4374283            |
| hsa-miR-561    | -0.008681 | -0.027778                      | 0.1982233                     | -2.214215                   | 0.5801513            |
| hsa-miR-562    | -0.113241 | -0.083333                      | NA                            | -5.324624                   | 0.2960867            |
| hsa-miR-563    | 0.0115741 | 0.0277778                      | NA                            | -0.386914                   | 0.5897014            |
| hsa-miR-564    | -0.068593 | -0.083333                      | NA                            | -3.61354                    | 0.0295709            |
| hsa-miR-566    | 0.0388185 | 0.0277778                      | NA                            | -0.358367                   | 0.140682             |
| hsa-miR-567    | -0.032986 | -0.083333                      | NA                            | -3.344104                   | 0.3715697            |
| hsa-miR-571    | -0.032986 | -0.083333                      | NA                            | -3.344104                   | 0.4570554            |
| hsa-miR-572    | -0.039931 | -0.083333                      | NA                            | -3.488777                   | 0.0295709            |
| hsa-miR-574-3p | 0.1348706 | -0.284907                      | 0.1196514                     | 0.1442405                   | -0.015228            |
| hsa-miR-574-5p | 0.2976522 | -0.141617                      | 0.1896141                     | 0.2647072                   | 0.4352828            |
| hsa-miR-575    | 0.0115741 | 0.0277778                      | NA                            | -0.38794                    | 0.1635128            |
| hsa-miR-576-3p | -0.224535 | -0.37641                       | 0.1705224                     | -1.239621                   | 0.2315195            |
| hsa-miR-576-5p | -0.582621 | -0.799647                      | -0.167918                     | -1.062704                   | -0.191718            |
| hsa-miR-577    | 0.0150463 | 0.0277778                      | NA                            | -0.366916                   | 0.7036718            |
| hsa-miR-578    | -0.002304 | -0.055556                      | 0.8707644                     | -2.774252                   | 0.3775591            |
| hsa-miR-579    | -0.067534 | -0.083333                      | 0.0781477                     | -3.018324                   | 0.4270011            |
| hsa-miR-580    | 0.0593709 | -0.150418                      | 0.8506593                     | -1.970564                   | 0.4575114            |
| hsa-miR-581    | -0.052827 | -0.055556                      | -0.021817                     | -2.938989                   | 0.3480329            |
| hsa-miR-582-3p | 0.0314077 | -0.349692                      | 0.1319544                     | 0.0020622                   | 0.0347929            |
| hsa-miR-582-5p | -0.137366 | -0.379406                      | 0.055338                      | -0.048296                   | 0.1309281            |

Table S1 (continued)

Table S1 (continued)

|                | Quantile  | Median counts<br>normalization | Total counts<br>normalization | Trimmed mean of<br>M-values | Conditional quantile |
|----------------|-----------|--------------------------------|-------------------------------|-----------------------------|----------------------|
| hsa-miR-583    | 0.0115741 | 0.0277778                      | NA                            | -0.386914                   | 0.5926139            |
| hsa-miR-584    | 0.0276938 | -0.166712                      | 0.1306486                     | -0.778451                   | 0.4032917            |
| hsa-miR-586    | 0.0106682 | 0                              | 0.1425695                     | -1.934881                   | 0.6079291            |
| hsa-miR-587    | 0.0124421 | 0.0277778                      | NA                            | -0.390153                   | 0.4608924            |
| hsa-miR-588    | -0.043403 | -0.083333                      | NA                            | -3.520975                   | 0.4815028            |
| hsa-miR-589    | -0.319041 | -0.522411                      | 0.055852                      | -0.689058                   | -0.027521            |
| hsa-miR-589*   | -0.06488  | -0.150418                      | -0.017197                     | -1.877409                   | 0.4195859            |
| hsa-miR-590-3p | -0.325229 | -0.619958                      | -0.084427                     | -0.528876                   | 0.0774846            |
| hsa-miR-590-5p | -0.108683 | -0.282498                      | 0.520744                      | -2.700384                   | 0.1710994            |
| hsa-miR-591    | 0.0682558 | 0.0555556                      | NA                            | 0.0462793                   | 0.5642176            |
| hsa-miR-592    | -0.086174 | -0.282                         | 0.1935072                     | -1.166693                   | 0.1715972            |
| hsa-miR-593    | -0.032986 | -0.083333                      | NA                            | -3.344104                   | 0.4521834            |
| hsa-miR-593*   | 0.0482407 | 0.0277778                      | NA                            | -0.364627                   | 0.1460037            |
| hsa-miR-596    | -0.056151 | -0.055556                      | -0.615445                     | -2.950028                   | 0.0573487            |
| hsa-miR-597    | -0.043403 | -0.083333                      | NA                            | -3.520975                   | 0.4866703            |
| hsa-miR-598    | -0.414224 | -0.552696                      | -0.044157                     | -1.104691                   | -0.030051            |
| hsa-miR-600    | 0.0419077 | -0.094862                      | 0.381932                      | -1.333304                   | 0.4720159            |
| hsa-miR-601    | -0.011126 | -0.055556                      | 0.595105                      | -2.78299                    | 0.514448             |
| hsa-miR-602    | -0.015538 | 0                              | -0.007347                     | -2.061053                   | 0.1129043            |
| hsa-miR-603    | 0.0398927 | 0.0555556                      | NA                            | -0.055187                   | 0.4400407            |
| hsa-miR-604    | 0.0526876 | 0.0555556                      | NA                            | -0.086881                   | 0.4277826            |
| hsa-miR-605    | -0.059771 | -0.055556                      | -0.471556                     | -2.96136                    | 0.5113225            |
| hsa-miR-606    | 0.0624904 | 0.0440267                      | 0.390674                      | -1.412525                   | 0.7414699            |
| hsa-miR-607    | 0.0115741 | 0.0277778                      | NA                            | -0.386914                   | 0.5900394            |
| hsa-miR-611    | -0.043403 | -0.083333                      | NA                            | -3.506723                   | 0.0295709            |
| hsa-miR-612    | 0.034204  | 0.0440267                      | 0.0416846                     | -1.617657                   | 0.156931             |
| hsa-miR-613    | -0.035809 | -0.055556                      | 0.2227401                     | -2.803246                   | 0.4531065            |
| hsa-miR-614    | 0.0310211 | 0.0277778                      | NA                            | -0.314959                   | 0.2711022            |
| hsa-miR-615-3p | 0.0772361 | 0.0833333                      | NA                            | 0.3205605                   | 0.1962376            |
| hsa-miR-615-5p | -0.293627 | -0.388889                      | -0.452769                     | -5.303983                   | -0.275985            |
| hsa-miR-616    | -0.068086 | -0.083333                      | NA                            | -3.591571                   | 0.4866703            |
| hsa-miR-616*   | -0.090946 | -0.310276                      | 0.3065722                     | -2.009174                   | 0.0742094            |
| hsa-miR-617    | 0.0124421 | 0.0277778                      | NA                            | -0.390153                   | 0.5977814            |
| hsa-miR-618    | -0.54139  | -0.707335                      | -0.04685                      | -1.401708                   | -0.322006            |
| hsa-miR-621    | -0.059771 | -0.055556                      | -0.41077                      | -2.959885                   | 0.3459819            |
| hsa-miR-623    | 0.044042  | 0.0555556                      | NA                            | -0.03779                    | 0.29888              |
| hsa-miR-624    | 0.0541344 | 0.0555556                      | NA                            | -0.085247                   | 0.4591441            |
| hsa-miR-624*   | 0.0727871 | 0.0995823                      | 0.1124669                     | -1.171057                   | 0.4840674            |
| hsa-miR-625    | 0.0825252 | -0.109023                      | 0.2643743                     | -0.744947                   | 0.4558135            |
| hsa-miR-625*   | 0.060726  | -0.002586                      | 0.7035088                     | -1.83386                    | 0.5200579            |

Table S1 (continued)

Table S1 (continued)

|                | Quantile  | Median counts<br>normalization | Total counts<br>normalization | Trimmed mean of<br>M-values | Conditional quantile |
|----------------|-----------|--------------------------------|-------------------------------|-----------------------------|----------------------|
| hsa-miR-626    | 0.0315998 | 0.0277778                      | NA                            | -0.323107                   | 0.4657355            |
| hsa-miR-627    | 0.1833388 | 0.2269424                      | NA                            | 1.0011682                   | 0.6114275            |
| hsa-miR-628-3p | -0.179842 | -0.215414                      | -0.238048                     | -2.904881                   | 0.3494226            |
| hsa-miR-628-5p | 0.3376749 | 0.2196358                      | 0.3670214                     | 0.2401347                   | 0.6732332            |
| hsa-miR-629    | 0.0146674 | -0.027778                      | 0.1099096                     | -0.630425                   | 0.5370583            |
| hsa-miR-629*   | 0.0245252 | -0.039307                      | 0.7014656                     | -2.23423                    | 0.2860729            |
| hsa-miR-631    | -0.032986 | -0.083333                      | NA                            | -3.344104                   | 0.0295709            |
| hsa-miR-634    | 0.0115741 | 0.0277778                      | NA                            | -0.386797                   | 0.5164029            |
| hsa-miR-635    | 0.1134509 | 0.0555556                      | 0.9734372                     | -1.07655                    | 0.6224336            |
| hsa-miR-636    | 0.0499661 | 0.0555556                      | NA                            | -0.068549                   | 0.1684598            |
| hsa-miR-637    | -0.003712 | -0.027778                      | 0.3080554                     | -2.313777                   | 0.0851265            |
| hsa-miR-638    | -0.092451 | -0.166667                      | 0.1261622                     | -3.239049                   | -0.053762            |
| hsa-miR-641    | -0.283819 | -0.415716                      | -0.026406                     | -1.849242                   | -0.017397            |
| hsa-miR-642a   | -0.002315 | 0                              | -0.084402                     | -2.034744                   | 0.5700036            |
| hsa-miR-642b   | -0.043403 | -0.083333                      | NA                            | -3.520975                   | 0.4052918            |
| hsa-miR-644    | 0.0400354 | -0.027778                      | 0.526126                      | -1.889762                   | 0.5341459            |
| hsa-miR-646    | 0.0388185 | 0.0277778                      | NA                            | -0.358367                   | 0.1635128            |
| hsa-miR-648    | 0.0194357 | 0.0277778                      | NA                            | -0.364046                   | 0.4000048            |
| hsa-miR-649    | 0.0219907 | 0.0555556                      | NA                            | -0.124604                   | 0.4400407            |
| hsa-miR-650    | -0.021412 | -0.055556                      | 0.3067111                     | -2.795019                   | 0.0573487            |
| hsa-miR-651    | -0.364341 | -0.57968                       | -0.128744                     | -1.100069                   | 0.0282492            |
| hsa-miR-652    | -0.02398  | -0.350355                      | 0.061016                      | -0.025426                   | 0.1255965            |
| hsa-miR-653    | 0.0130208 | 0.0277778                      | NA                            | -0.386383                   | 0.4313663            |
| hsa-miR-654-3p | -0.283301 | -0.661371                      | -0.096955                     | -0.279302                   | -0.138726            |
| hsa-miR-654-5p | -0.088267 | -0.115831                      | 0.1038686                     | -3.516164                   | -0.005662            |
| hsa-miR-655    | -0.062286 | 0.0277778                      | -0.306254                     | -4.016529                   | 0.7252209            |
| hsa-miR-656    | -0.356862 | -0.474401                      | -0.188325                     | -1.845898                   | 0.2014928            |
| hsa-miR-657    | 0.0435124 | 0.0555556                      | NA                            | -0.054205                   | 0.29888              |
| hsa-miR-660    | -0.025728 | -0.47509                       | 0.0079848                     | -0.050589                   | 0.0035417            |
| hsa-miR-661    | 0.0425952 | 0.0555556                      | NA                            | -0.01702                    | 0.1684598            |
| hsa-miR-662    | -0.054126 | -0.055556                      | -0.39838                      | -2.943193                   | 0.0573487            |
| hsa-miR-663    | -0.17553  | -0.492208                      | -0.034778                     | 0.1915612                   | -0.375801            |
| hsa-miR-663b   | -0.010307 | -0.083333                      | 0.5025527                     | -2.638646                   | 0.0295709            |
| hsa-miR-664    | 0.4098761 | 0.0492063                      | 0.26405                       | 0.5302988                   | 0.427849             |
| hsa-miR-664*   | -0.180873 | -0.125226                      | -0.230678                     | -2.620702                   | 0.2730929            |
| hsa-miR-665    | 0.0018253 | -0.032498                      | 0.017333                      | -2.016808                   | 0.0804063            |
| hsa-miR-670    | 0.0008005 | -0.055556                      | 1.0970441                     | -2.789229                   | 0.4196151            |
| hsa-miR-671-3p | -0.21744  | -0.403697                      | -0.1716                       | -1.026782                   | -0.290793            |
| hsa-miR-671-5p | 0.4198907 | 0.2872181                      | 0.3760933                     | 0.0108969                   | 0.4021025            |
| hsa-miR-675    | 0.2816185 | 0.2259919                      | 0.4002141                     | -0.216551                   | 0.3424931            |

Table S1 (continued)

Table S1 (continued)

|                | Quantile  | Median counts<br>normalization | Total counts<br>normalization | Trimmed mean of<br>M-values | Conditional quantile |
|----------------|-----------|--------------------------------|-------------------------------|-----------------------------|----------------------|
| hsa-miR-675*   | -0.291409 | -0.483946                      | 0.0658281                     | -0.69232                    | -0.187056            |
| hsa-miR-676    | -0.034596 | -0.060276                      | 0.0471544                     | -2.355825                   | 0.372839             |
| hsa-miR-676*   | 0.0310211 | 0.0277778                      | NA                            | -0.314959                   | 0.5926139            |
| hsa-miR-7      | -0.003716 | -0.093271                      | 0.1003392                     | -0.749405                   | 0.417063             |
| hsa-miR-7-1*   | -0.166581 | -0.405681                      | 0.2119617                     | -1.039395                   | -0.021196            |
| hsa-miR-7-2*   | 0.0402199 | 0.0833333                      | NA                            | 0.1089082                   | 0.4678185            |
| hsa-miR-708    | -0.072997 | -0.187636                      | 0.1868554                     | -0.997949                   | 0.3792423            |
| hsa-miR-708*   | 0.2026736 | 0.0718045                      | 0.6492742                     | -1.094181                   | 0.5944488            |
| hsa-miR-711    | 0.0115741 | 0.0277778                      | NA                            | -0.38794                    | 0.140682             |
| hsa-miR-718    | 0.2216605 | 0.25                           | NA                            | 1.3732966                   | 0.3629043            |
| hsa-miR-720    | -0.132173 | -0.339282                      | 0.0286895                     | -0.813243                   | -0.212243            |
| hsa-miR-744    | -0.137915 | -0.491479                      | -0.012626                     | -0.164282                   | -0.364798            |
| hsa-miR-744*   | 0.0672282 | -0.034586                      | 0.3735314                     | -1.269479                   | 0.5354171            |
| hsa-miR-758    | -0.243058 | -0.433111                      | 0.1944309                     | -1.218216                   | 0.1368928            |
| hsa-miR-759    | -0.080461 | -0.076525                      | -0.248834                     | -2.608065                   | 0.3079605            |
| hsa-miR-760    | 0.0115741 | 0.0277778                      | NA                            | -0.386914                   | 0.140682             |
| hsa-miR-761    | 0.0298637 | 0.0277778                      | NA                            | -0.286232                   | 0.5164029            |
| hsa-miR-762    | 0.070976  | 0.0230576                      | 0.2986419                     | -1.351423                   | 0.1359619            |
| hsa-miR-764    | 0.0150463 | 0.0277778                      | NA                            | -0.366916                   | 0.3503374            |
| hsa-miR-765    | 0.0240162 | 0.0555556                      | NA                            | -0.129165                   | 0.5959443            |
| hsa-miR-766    | 0.2794154 | 0.257992                       | 0.2863858                     | -0.091314                   | 0.3708963            |
| hsa-miR-767-5p | 0.0266204 | 0.0555556                      | NA                            | -0.106026                   | 0.5997315            |
| hsa-miR-769-3p | 0.004537  | 0                              | 0.0841322                     | -1.895607                   | 0.2433244            |
| hsa-miR-769-5p | 0.3738542 | -0.073144                      | 0.2112903                     | 0.3492022                   | 0.48624              |
| hsa-miR-770-5p | 0.0231481 | 0.0555556                      | NA                            | -0.123522                   | 0.29888              |
| hsa-miR-802    | 0.0460674 | 0.0555556                      | NA                            | 0.0048675                   | 0.56589              |
| hsa-miR-873    | -0.085579 | -0.222222                      | 0.5374037                     | -3.112609                   | 0.3181665            |
| hsa-miR-874    | 0.431739  | 0.0984255                      | 0.2775618                     | 0.6452583                   | 0.2928168            |
| hsa-miR-875-3p | 0.0144676 | 0.0277778                      | NA                            | -0.383929                   | 0.5681665            |
| hsa-miR-875-5p | 0.0500159 | 0                              | 0.6977196                     | -1.948302                   | 0.4535973            |
| hsa-miR-876-3p | -0.067708 | -0.166667                      | NA                            | -4.129146                   | 0.4412624            |
| hsa-miR-876-5p | 0.0167824 | 0.0277778                      | NA                            | -0.363828                   | 0.4813751            |
| hsa-miR-877    | -0.075915 | 0                              | -1.087213                     | -3.542744                   | 0.1129043            |
| hsa-miR-877*   | 0.0593284 | 0.0995823                      | NA                            | 0.0984158                   | 0.2947384            |
| hsa-miR-885-3p | -0.081079 | -0.293574                      | 0.1811854                     | -0.664497                   | 0.0289855            |
| hsa-miR-885-5p | -0.199129 | -0.662232                      | -0.087758                     | -0.24284                    | -0.125991            |
| hsa-miR-887    | -0.223852 | -0.408231                      | -0.055679                     | -0.738261                   | -0.295128            |
| hsa-miR-888    | 0.0683333 | 0.0277778                      | 0.9745079                     | -1.41963                    | 0.4313663            |
| hsa-miR-889    | -0.257703 | -0.523327                      | -0.112651                     | -0.457766                   | 0.038935             |
| hsa-miR-890    | -0.119519 | -0.222222                      | 0.3850541                     | -4.023241                   | 0.2108924            |

Table S1 (continued)

Table S1 (continued)

|                | Quantile  | Median counts<br>normalization | Total counts<br>normalization | Trimmed mean of<br>M-values | Conditional quantile |
|----------------|-----------|--------------------------------|-------------------------------|-----------------------------|----------------------|
| hsa-miR-891a   | -0.032986 | -0.083333                      | NA                            | -3.344104                   | 0.4052918            |
| hsa-miR-891b   | 0.0104167 | 0.0277778                      | NA                            | -0.385619                   | 0.4122629            |
| hsa-miR-892b   | 0.0231481 | 0.0555556                      | NA                            | -0.124554                   | 0.5441807            |
| hsa-miR-9      | -0.41645  | -0.609209                      | -0.071124                     | -0.875401                   | -0.098874            |
| hsa-miR-9*     | -0.009838 | -0.027778                      | 0.1460234                     | -2.201132                   | 0.5801513            |
| hsa-miR-920    | 0.0783581 | 0.0555556                      | NA                            | -0.028999                   | 0.3382916            |
| hsa-miR-921    | -0.043403 | -0.083333                      | NA                            | -3.520975                   | 0.4638548            |
| hsa-miR-924    | 0.0615537 | 0.0440267                      | 0.1498445                     | -1.982271                   | 0.5526888            |
| hsa-miR-92a    | -0.184828 | -0.537864                      | -0.022177                     | -0.105892                   | -0.066354            |
| hsa-miR-92a-1* | 0.0566507 | -0.170436                      | 0.3496192                     | -0.588114                   | 0.3737395            |
| hsa-miR-92a-2* | -0.043403 | -0.083333                      | NA                            | -3.531009                   | 0.4866703            |
| hsa-miR-92b    | -0.280122 | -0.568496                      | 0.0248705                     | -0.225081                   | -0.54621             |
| hsa-miR-92b*   | 0.0606059 | 0.0833333                      | NA                            | 0.1591284                   | 0.1962376            |
| hsa-miR-93     | 0.0809245 | -0.39061                       | 0.0562661                     | 0.0402088                   | 0.1924603            |
| hsa-miR-93*    | -0.125683 | -0.169298                      | -0.005744                     | -1.598872                   | 0.1532613            |
| hsa-miR-934    | 0.0643571 | 0.0555556                      | NA                            | 0.0708                      | 0.6255592            |
| hsa-miR-935    | 0.0388185 | 0.0277778                      | NA                            | -0.358367                   | 0.140682             |
| hsa-miR-937    | 0.0636312 | 0.0718045                      | 0.2376216                     | -1.373659                   | 0.1849076            |
| hsa-miR-938    | 0.0115741 | 0.0277778                      | NA                            | -0.386914                   | 0.5977814            |
| hsa-miR-939    | -0.005536 | 0.0277778                      | -0.255492                     | -1.801485                   | 0.140682             |
| hsa-miR-940    | 0.1009969 | 0.0880535                      | 0.1109636                     | -1.673374                   | 0.2009577            |
| hsa-miR-941    | 0.0324036 | -0.320228                      | 0.0647541                     | 0.13078                     | -0.198663            |
| hsa-miR-942    | -0.059771 | -0.104302                      | -0.344412                     | -2.903268                   | 0.4183418            |
| hsa-miR-943    | -0.043403 | -0.083333                      | NA                            | -3.531009                   | 0.1118227            |
| hsa-miR-944    | 0.06604   | 0.1551378                      | -0.64379                      | -1.685191                   | 0.763067             |
| hsa-miR-95     | -0.213394 | -0.532996                      | 0.1132646                     | -0.488708                   | -0.079398            |
| hsa-miR-96     | 0.0421941 | -0.055556                      | 0.4146525                     | -1.654409                   | 0.3297738            |
| hsa-miR-96*    | -0.083818 | -0.055556                      | -0.398628                     | -4.393652                   | 0.3289296            |
| hsa-miR-98     | -0.155738 | -0.588736                      | -0.044016                     | -0.159344                   | -0.037827            |
| hsa-miR-99a    | -0.095577 | -0.56281                       | -0.027385                     | -0.133445                   | -0.019483            |
| hsa-miR-99a*   | 0.0710616 | -0.328164                      | 0.1219119                     | 0.0562505                   | 0.1999456            |
| hsa-miR-99b    | 0.1402771 | -0.274007                      | 0.123819                      | 0.1576469                   | -0.245308            |
| hsa-miR-99b*   | 0.1484039 | -0.06889                       | 0.4321855                     | -0.235431                   | 0.0440146            |
